# Supplementary material for: Fluorinated and N-Acryloyl-Modified 3,5-Di[(E)-benzylidene]piperidin-4-one Curcuminoids for the Treatment of Pancreatic Carcinoma
Source: MDPI journal article supplement (doi:10.3390/pharmaceutics15071921), 2023-07-11

## Supplementary Material

# Fluorinated and *N*-Acryloyl-Modified 3,5-Di[(*E*)-benzylidene]piperidin-4-one curcuminoids for the treatment of pancreatic carcinoma

Hindole Ghosh <sup>1</sup>, Sangita Bhattacharyya <sup>1</sup>, Rainer Schobert <sup>2</sup>, Prasad Dandawate <sup>1</sup> and Bernhard Biersack <sup>2,\*</sup>

<sup>1</sup>Cancer Biology, University of Kansas Medical Center, 3901 Rainbow Boulevard, Kansas City, KS 66160, USA; hghosh@kumc.edu, sbhattacharyya@kumc.edu, pdandawate@kumc.edu

<sup>2</sup>Organic Chemistry 1, University of Bayreuth, Universitätsstrasse 30, 95440 Bayreuth, Germany; rainer.schobert@uni-bayreuth.de, bernhard.biersack@uni-bayreuth.de

\*Correspondence: bernhard.biersack@uni-bayreuth.de, bernhard.biersack@yahoo.com

**Table S1.** Inhibitory concentrations (IC<sub>50</sub> in  $\mu\text{M}$ )<sup>1</sup> of EF24 and compound **2d** when applied to immortalized normal pancreatic ductal cells HPNE and monocyte cell line THP-1 after 72 h.

| Cell lines | EF24               | 2d                |
|------------|--------------------|-------------------|
| HPNE       | 2.3 $\pm$ 0.64     | 2.05 $\pm$ 0.39   |
| THP1       | > 10 $\mu\text{M}$ | >10 $\mu\text{M}$ |

<sup>1</sup> IC<sub>50</sub> values  $\pm$  SD were calculated from the dose-response curves of three independent experiments.

**Table S2.** Statistical analysis of dose-response curves of EF24 (**1a**), **2c**, **2d**, and **2g–i** in MiaPaCa-2 and Panc-1 pancreatic cancer cells at the indicated time points.

| p values |                    |           |          |          |          |          |          |
|----------|--------------------|-----------|----------|----------|----------|----------|----------|
|          | Concentration (μM) | MiaPaCa-2 |          |          | Panc-1   |          |          |
|          |                    | 24 h      | 48 h     | 72 h     | 24 h     | 48 h     | 72 h     |
| EF24     | 0                  |           |          |          |          |          |          |
|          | 0.15625            | 0.02802   | 0.000758 | 0.068558 | 0.825069 | 0.003479 | 0.02982  |
|          | 0.3125             | 0.001909  | 0.160187 | 0.033967 | 0.965481 | 0.000306 | 0.0442   |
|          | 0.625              | 0.00463   | 0.078627 | 0.0003   | 0.879541 | 0.030057 | 0.00482  |
|          | 1.25               | 0.008242  | 0.077355 | 0.003001 | 0.772516 | 0.048285 | 0.005496 |
|          | 2.5                | 0.002328  | 0.000443 | 2.45E-05 | 0.22838  | 0.00056  | 0.000443 |
|          | 5                  | 0.002841  | 0.005327 | 1.07E-05 | 0.02047  | 0.000374 | 1.51E-05 |
|          |                    |           |          |          |          |          |          |
| 2c       | 0                  |           |          |          |          |          |          |
|          | 0.15625            | 0.001165  | 0.015913 | 0.067368 | 0.054244 | 0.063715 | 0.29907  |
|          | 0.3125             | 0.010269  | 0.02312  | 0.00322  | 0.013919 | 0.023115 | 0.184221 |
|          | 0.625              | 0.038427  | 0.013691 | 0.000206 | 0.001012 | 0.04302  | 0.040358 |
|          | 1.25               | 0.000617  | 0.009385 | 0.00011  | 0.003523 | 0.011118 | 7.86E-05 |
|          | 2.5                | 0.000689  | 0.007545 | 0.000111 | 0.013841 | 0.011989 | 0.001139 |
|          | 5                  | 0.000746  | 0.003014 | 7.61E-05 | 0.037907 | 0.008141 | 0.00069  |
| 2d       | 0                  |           |          |          |          |          |          |
|          | 0.15625            | 0.070948  | 0.016849 | 0.026471 | 0.609201 | 0.009397 | 0.390053 |
|          | 0.3125             | 0.022205  | 0.020083 | 0.000238 | 0.459126 | 0.052244 | 0.095258 |
|          | 0.625              | 0.066718  | 0.015383 | 0.014833 | 0.093038 | 0.011609 | 0.004116 |
|          | 1.25               | 0.040853  | 0.011428 | 0.00848  | 0.002466 | 8.68E-05 | 2.41E-09 |
|          | 2.5                | 0.087131  | 0.015555 | 0.009426 | 0.000557 | 3.34E-05 | 1.62E-05 |
|          | 5                  | 0.039226  | 0.011247 | 0.011479 | 0.000214 | 2.79E-05 | 1.59E-05 |
| 2g       | 0                  |           |          |          |          |          |          |
|          | 0.15625            | 9.21E-05  | 0.010536 | 0.722117 | 0.431106 | 0.203007 | 0.200738 |
|          | 0.3125             | 0.007664  | 0.003592 | 0.033492 | 0.59158  | 0.192595 | 0.073197 |
|          | 0.625              | 0.004725  | 0.000152 | 0.000186 | 0.477306 | 0.012689 | 0.008118 |
|          | 1.25               | 0.001152  | 0.000109 | 0.000459 | 0.023684 | 3.61E-05 | 4.7E-06  |
|          | 2.5                | 0.00304   | 7.17E-05 | 3.84E-05 | 0.017397 | 0.000892 | 1.76E-05 |
|          | 5                  | 0.002798  | 7.05E-05 | 6.28E-05 | 0.004106 | 0.000532 | 8.85E-06 |
| 2h       | 0                  |           |          |          |          |          |          |
|          | 0.15625            | 2.99E-05  | 0.024734 | 0.074793 | 0.152711 | 0.246178 | 0.112263 |
|          | 0.3125             | 0.00783   | 0.024678 | 0.007062 | 0.237733 | 0.164897 | 0.037765 |
|          | 0.625              | 0.013537  | 0.004521 | 0.050885 | 0.021351 | 0.056353 | 0.005605 |
|          | 1.25               | 0.016891  | 0.013405 | 0.019606 | 0.00918  | 0.001286 | 2.08E-11 |
|          | 2.5                | 0.015843  | 0.016675 | 0.021269 | 0.001142 | 0.004546 | 8.57E-06 |
|          | 5                  | 0.014552  | 0.013094 | 0.02628  | 0.002354 | 0.000816 | 1.15E-05 |
| 2i       | 0                  |           |          |          |          |          |          |
|          | 0.15625            | 0.054276  | 0.006122 | 0.067449 | 0.36447  | 0.20061  | 0.008287 |
|          | 0.3125             | 0.019464  | 0.218863 | 0.00903  | 0.19091  | 0.241849 | 0.002689 |
|          | 0.625              | 0.013611  | 0.018439 | 0.114977 | 0.012352 | 0.024517 | 0.000628 |
|          | 1.25               | 0.000869  | 0.00129  | 0.052726 | 0.001207 | 1.56E-06 | 1.35E-05 |
|          | 2.5                | 0.000674  | 0.001366 | 0.057217 | 0.004101 | 8.69E-05 | 1.4E-06  |
|          | 5                  | 0.000929  | 0.00277  | 0.064769 | 0.00103  | 0.000294 | 0.000231 |

**Figure S1.** Apoptosis induction by EF24 (**1a**) and **2d** in pancreatic cancer cell line MiaPaCa-2. Western blots of apoptotic proteins were quantified using Bio-Rad's Image lab software and expressed as compared to actin in arbitrary units.

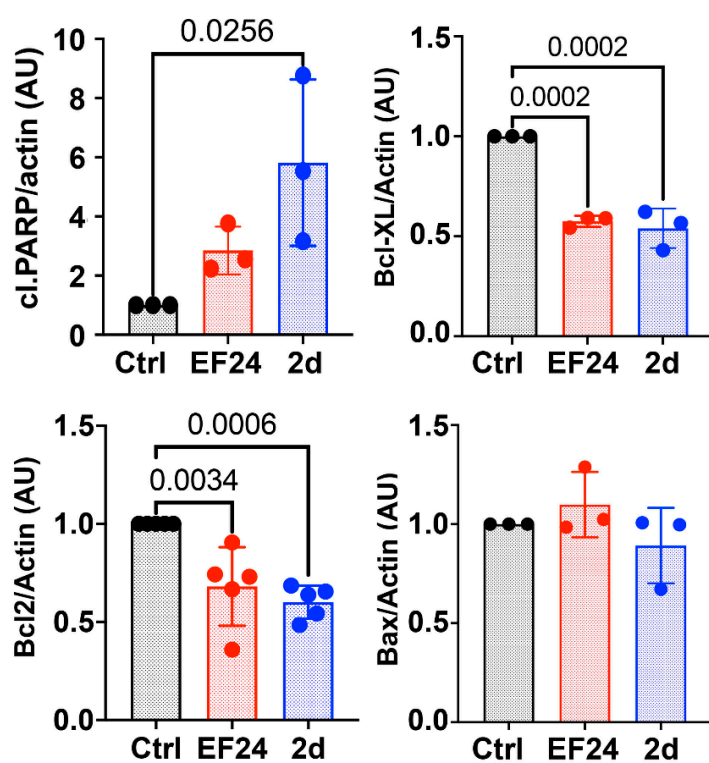



**Figure S2.** Protein levels of STAT3 and p-STAT3 in MiaPaCa-2 and Panc-1 pancreatic cancer cells upon treatment with EF24 and **2d**. Western blot of p-STAT3 protein was quantified using Bio-Rad's Image lab software and expressed as compared to total STAT3 in arbitrary units.

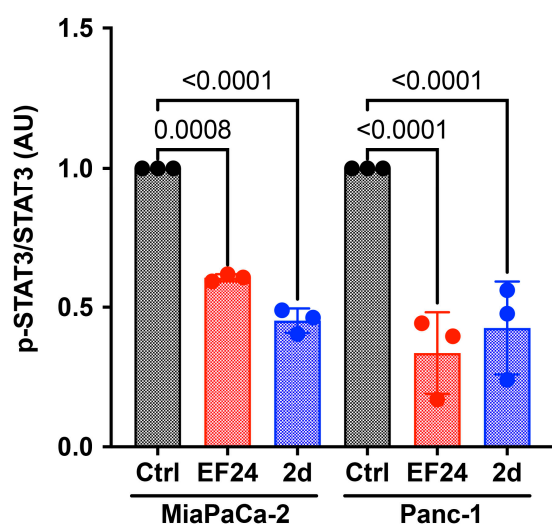

$^1\text{H}$  NMR spectrum of **1c**

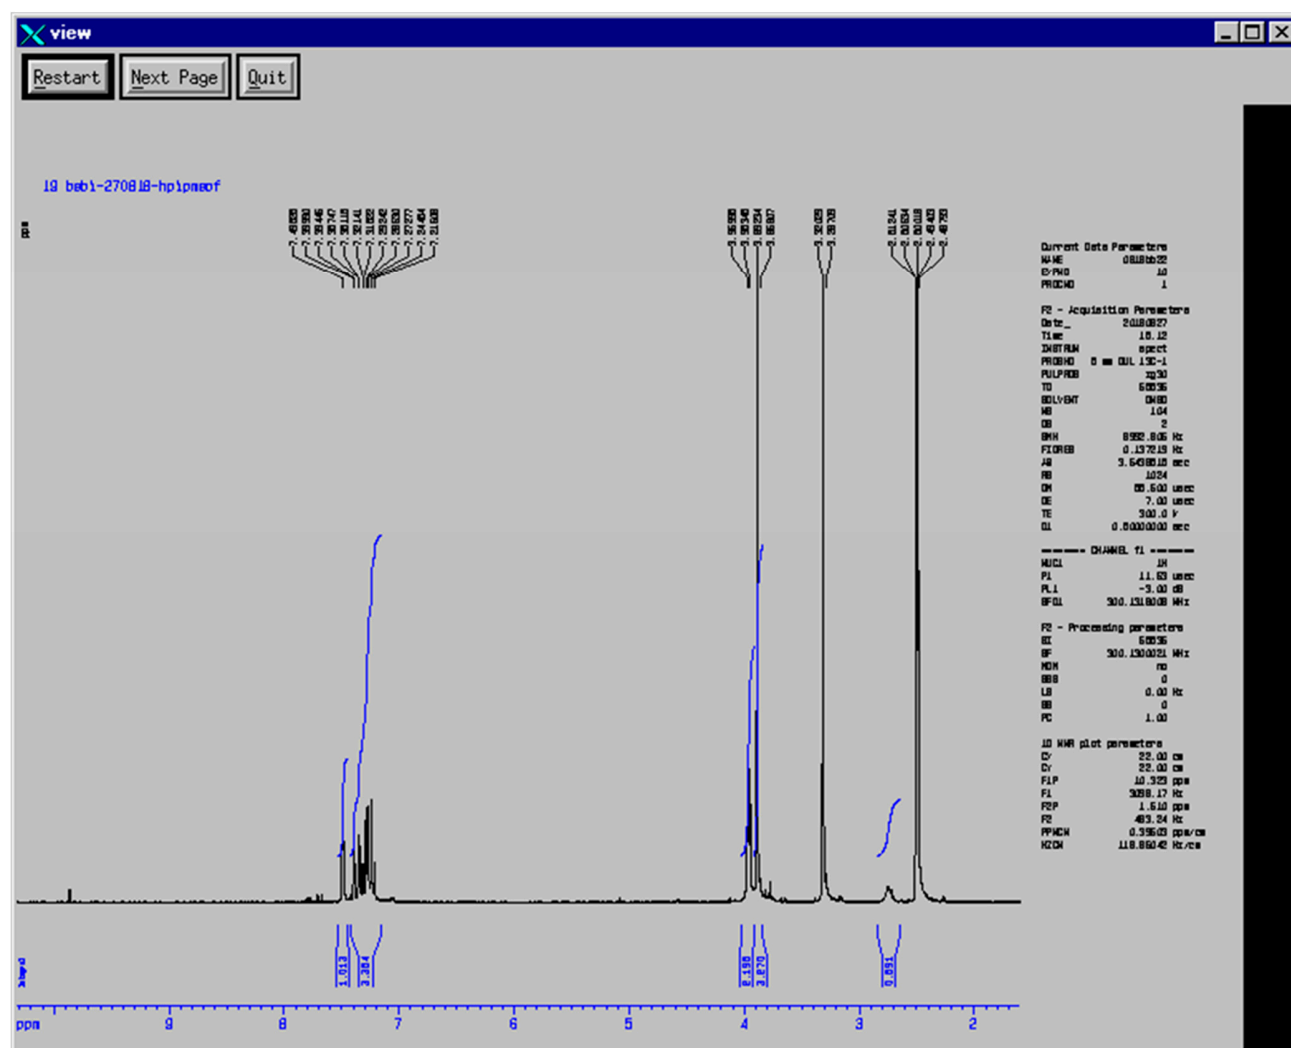

$^{13}\text{C}$  NMR spectrum of **1c**

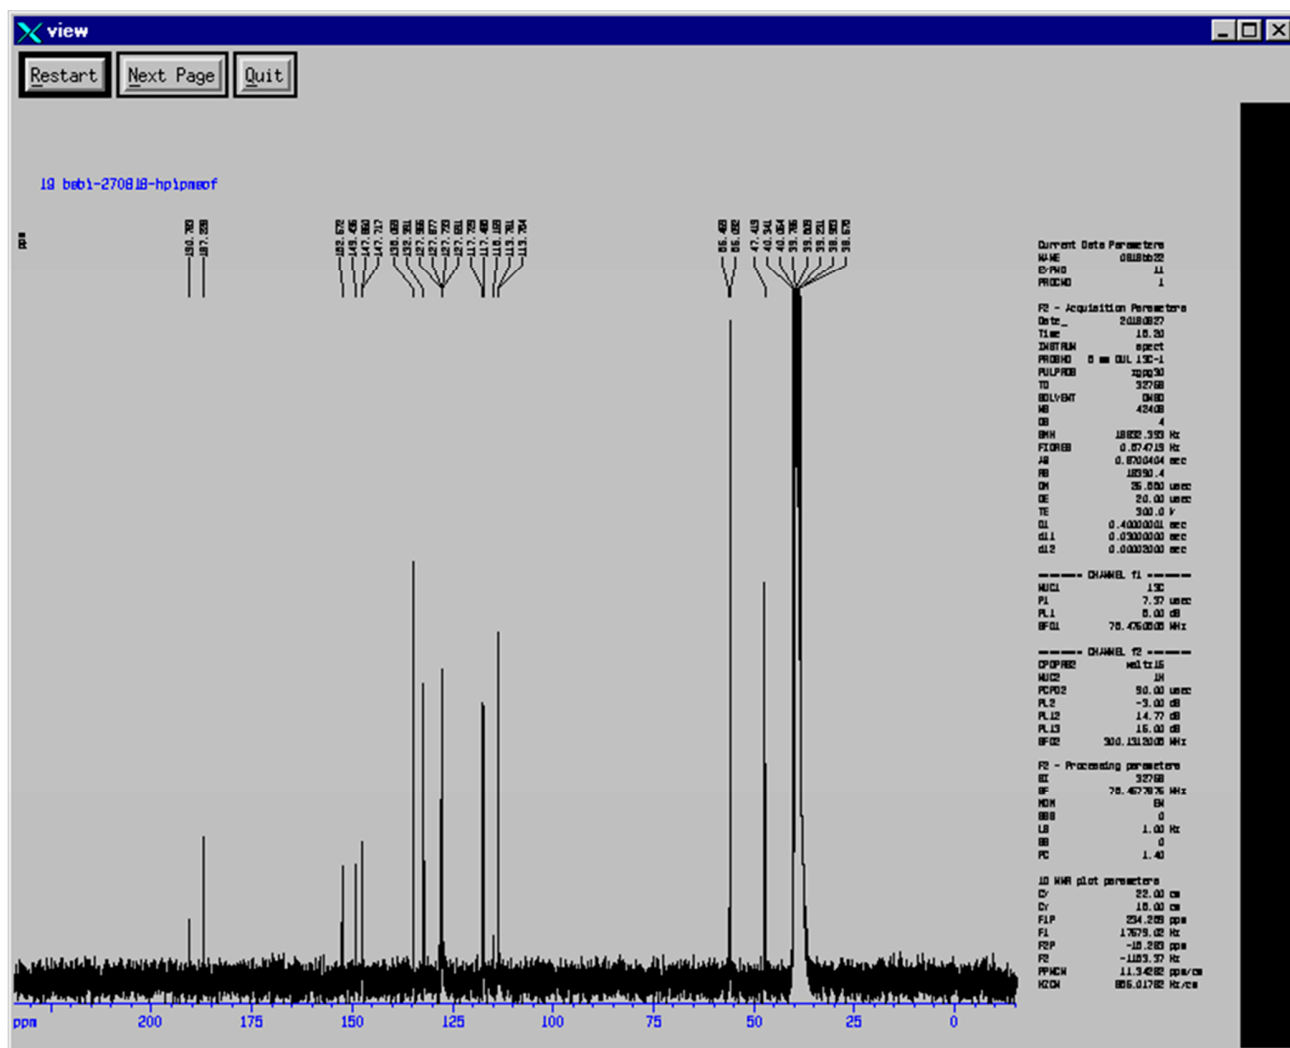

$^1\text{H}$  NMR spectrum of **1e**

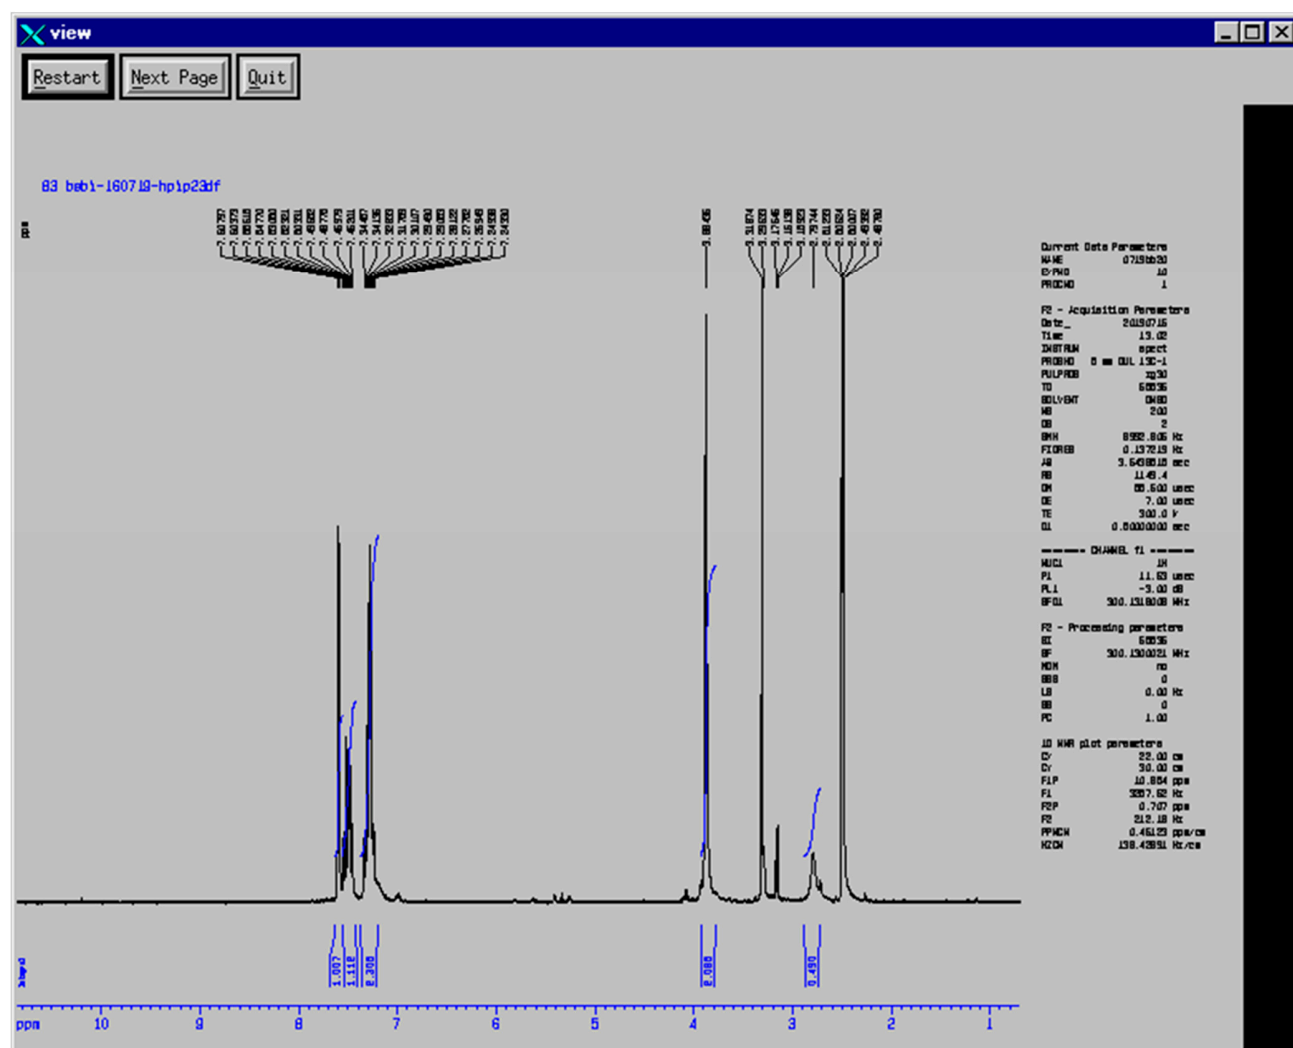

The screenshot displays the UXNMR software interface. At the top, there is a title bar with the 'view' logo and standard window controls. Below the title bar are three buttons: 'Restart', 'Next Page', and 'Quit'. The main window area is divided into three sections. The left section shows an NMR spectrum with a baseline and several sharp peaks. The x-axis is labeled 'ppm' and ranges from 0 to 10. The y-axis is labeled 'Intensity'. The right section displays acquisition parameters for two channels, F1 and F2. The bottom section shows the processing parameters for the F1 channel. The spectrum shows a large peak at approximately 7.5 ppm and several smaller peaks between 1 and 5 ppm. The acquisition parameters for F1 include: Date: 20090716, Time: 18.14, Instrument: spect, Probe: 5 mm QNP 1H-1, PULPROG: zgpg30, TO: 32768, DELTAT: 0.000, NS: 4096, DS: 4, BPH: 18000.000 Hz, FIDRES: 0.374718 Hz, AQ: 0.8200404 sec, RG: 65536.0, CH: 26.000 umsec, DE: 2.000 umsec, TE: 300.2 K, OL: 0.4000000 sec, dL1: 0.0300000 sec, dL2: 0.0002000 sec. The acquisition parameters for F2 include: Date: 20090716, Time: 18.14, Instrument: spect, Probe: 5 mm QNP 1H-1, PULPROG: zgpg30, TO: 32768, DELTAT: 0.000, NS: 4096, DS: 4, BPH: 18000.000 Hz, FIDRES: 0.374718 Hz, AQ: 0.8200404 sec, RG: 65536.0, CH: 26.000 umsec, DE: 2.000 umsec, TE: 300.2 K, OL: 0.4000000 sec, dL1: 0.0300000 sec, dL2: 0.0002000 sec. The processing parameters for F1 include: MUC1: 13C, PL: 7.37 umsec, PL1: 0.00 dB, RFDR: 78.476200 MHz, CPDPRG2: waltz16, MUC2: 1H, PCPD2: 90.00 umsec, PL2: -3.00 dB, PL12: 14.77 dB, PL13: 16.00 dB, RFDR: 300.131200 MHz, F2 - Processing parameters: EQ: 32768, RF: 78.467876 MHz, NCH: 0, NS: 0, LB: 1.00 Hz, BB: 0, PC: 1.40, 1D NMR plot parameters: CV: 22.00 cm, CY: 18.00 cm, F1P: 234.200 pps, F1: 1767.00 Hz, F2P: -10.200 pps, F2: -1103.37 Hz, PPMCH: 11.54000 pps/cm, KCH: 886.01700 Hz/cm.

view

Restart Next Page Quit

83 bbb1-160713-hp1p23df

ppm

Intensity

Current Data Parameters

NAME 07190030

EXPNO 11

PROCNO 1

F2 - Acquisition Parameters

Date\_ 20090716

Time 18.14

INSTRUM spect

PROBHD 5 mm QNP 1H-1

PULPROG zgpg30

TO 32768

DELTA 0.000

NS 4096

DS 4

BPH 18000.000 Hz

FIDRES 0.374718 Hz

AQ 0.8200404 sec

RG 65536.0

CH 26.000 umsec

DE 2.000 umsec

TE 300.2 K

OL 0.4000000 sec

dL1 0.0300000 sec

dL2 0.0002000 sec

----- CHANNEL F1 -----

MUC1 13C

PL 7.37 umsec

PL1 0.00 dB

RFDR 78.476200 MHz

----- CHANNEL F2 -----

CPDPRG2 waltz16

MUC2 1H

PCPD2 90.00 umsec

PL2 -3.00 dB

PL12 14.77 dB

PL13 16.00 dB

RFDR 300.131200 MHz

F2 - Processing parameters

EQ 32768

RF 78.467876 MHz

NCH 0

NS 0

LB 1.00 Hz

BB 0

PC 1.40

1D NMR plot parameters

CV 22.00 cm

CY 18.00 cm

F1P 234.200 pps

F1 1767.00 Hz

F2P -10.200 pps

F2 -1103.37 Hz

PPMCH 11.54000 pps/cm

KCH 886.01700 Hz/cm

Exceed

UXNMR Version 3.1 on A...

lock

Spektrn.doc - Microsoft ...

view

$^1\text{H}$  NMR spectrum of **1f**

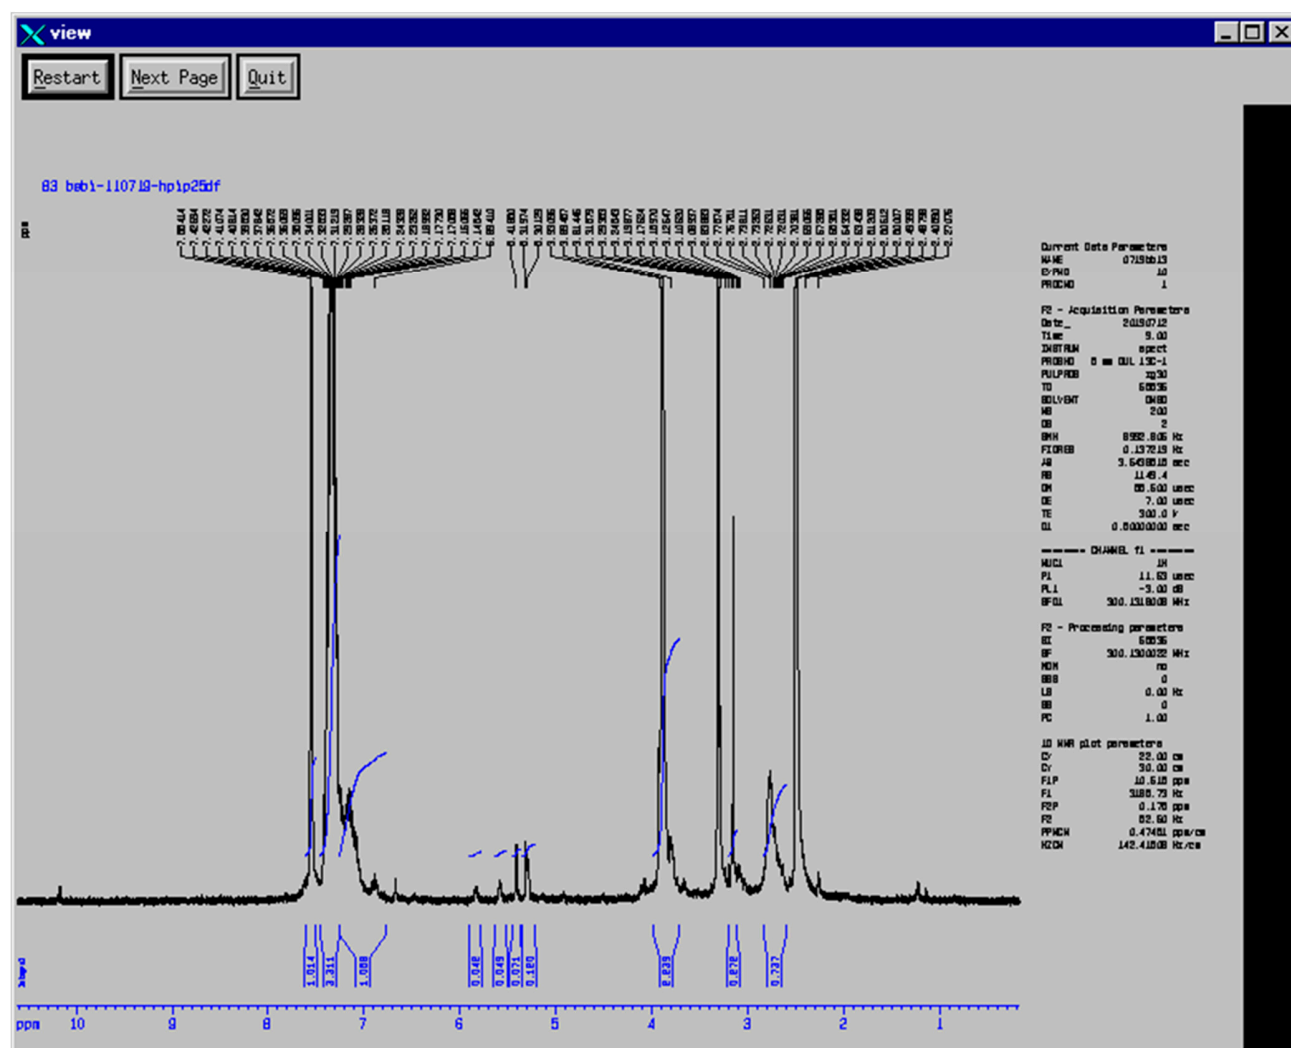

$^{13}\text{C}$  NMR spectrum of **1f**

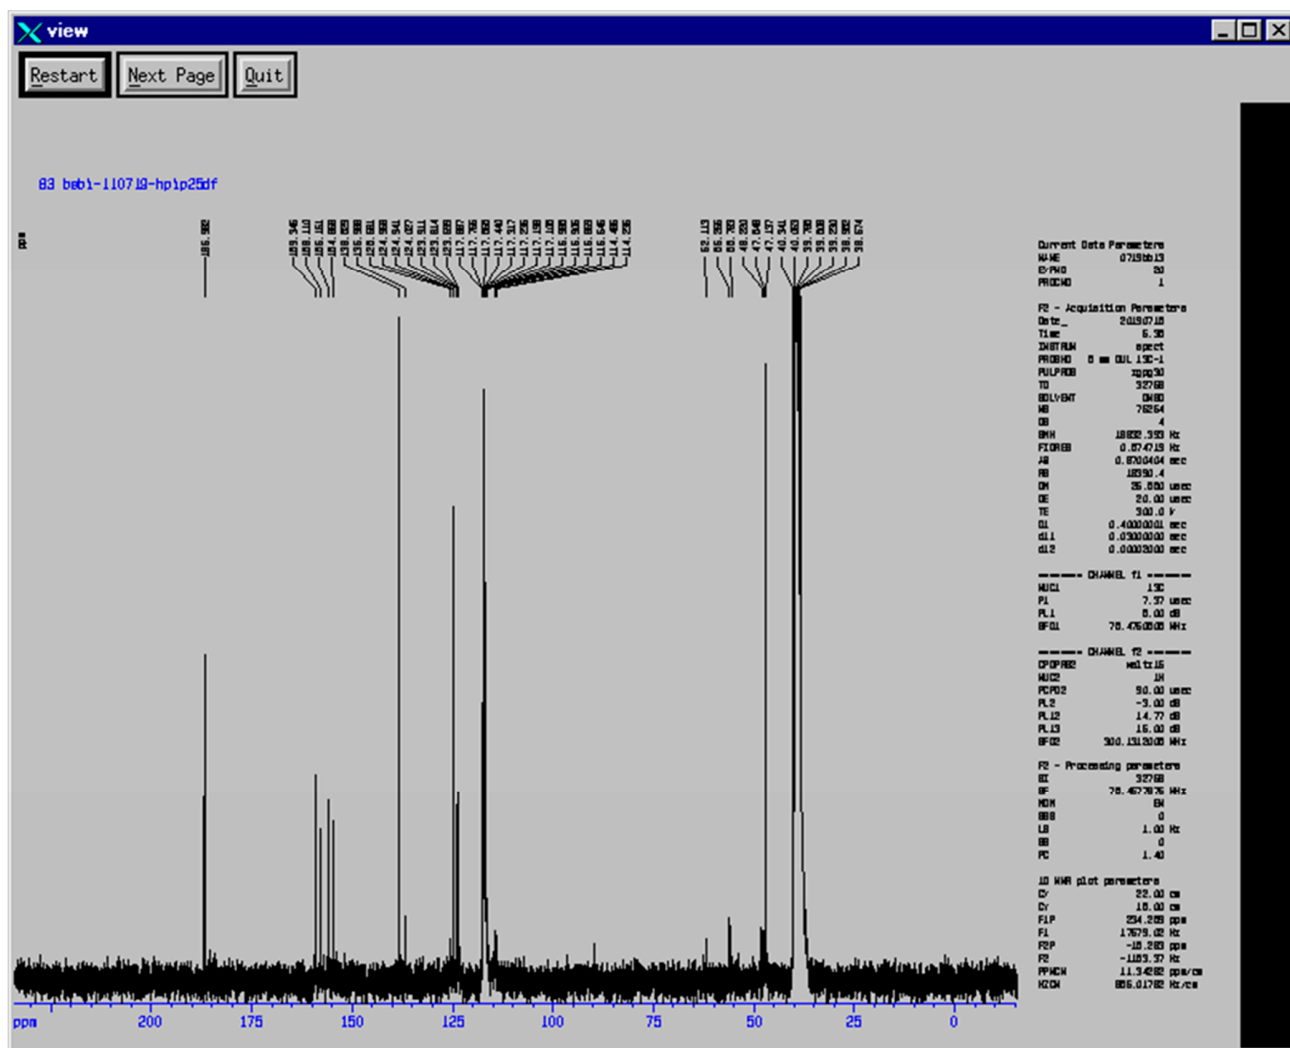

$^1\text{H}$  NMR spectrum of **1g**

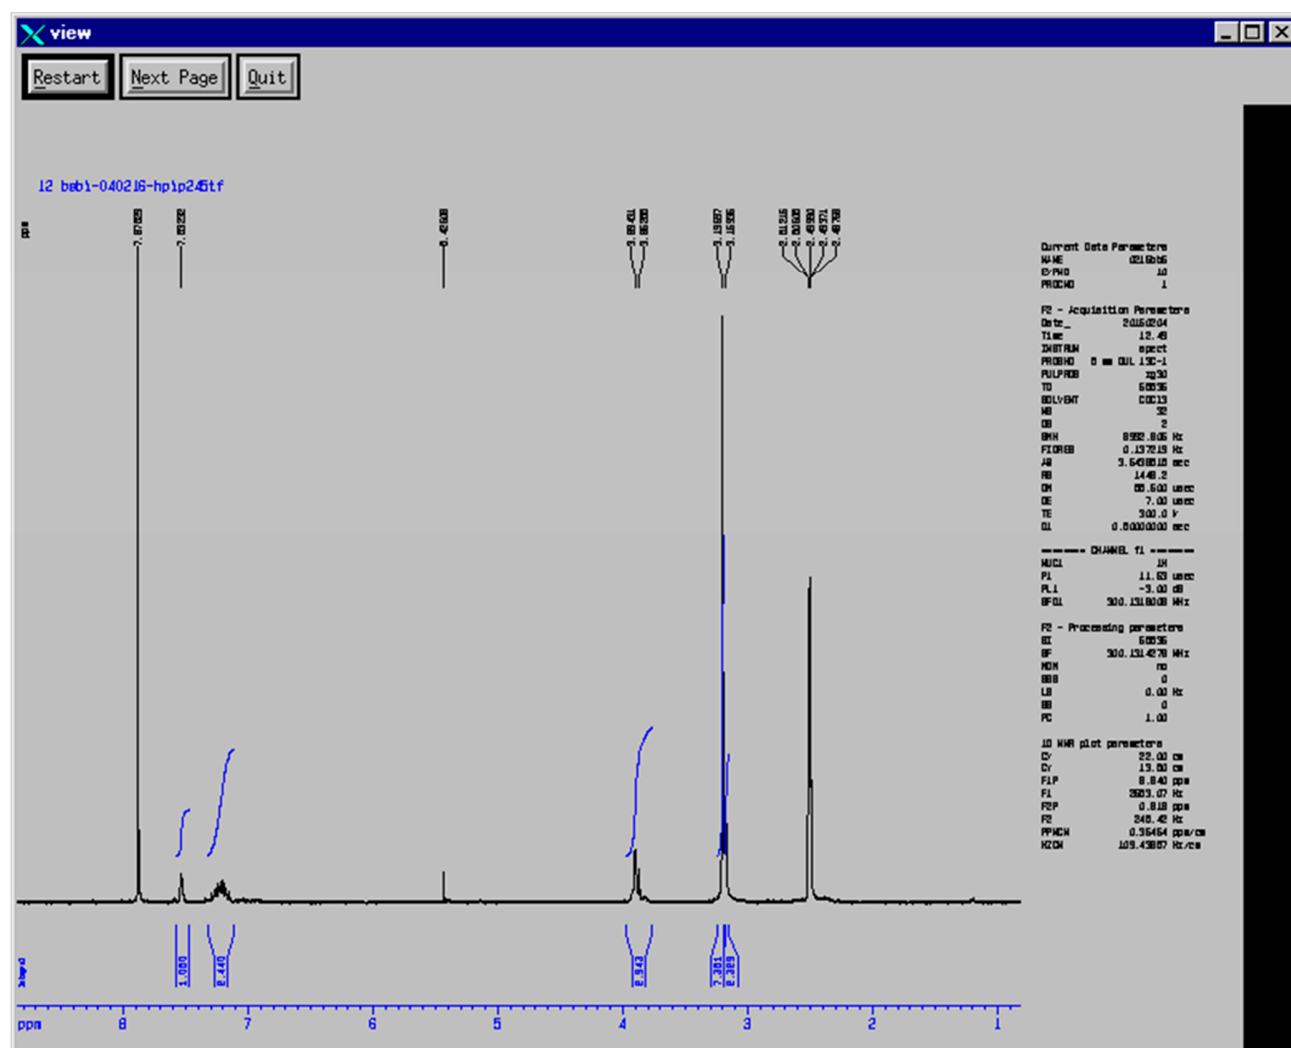



$^{13}\text{C}$  NMR spectrum of **1g**

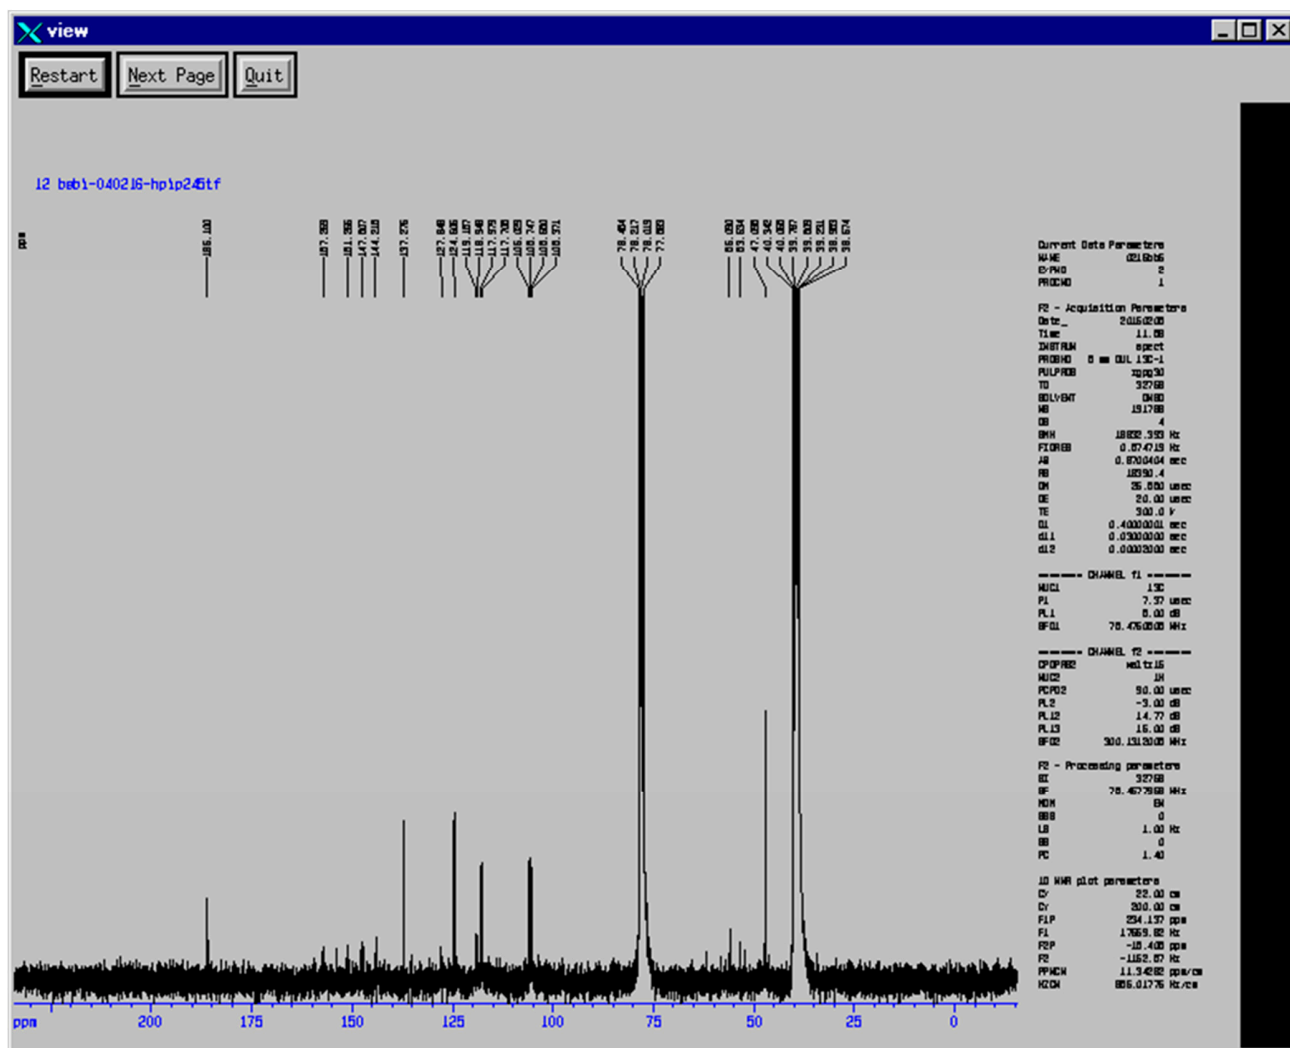

$^1\text{H}$  NMR spectrum of **1h**

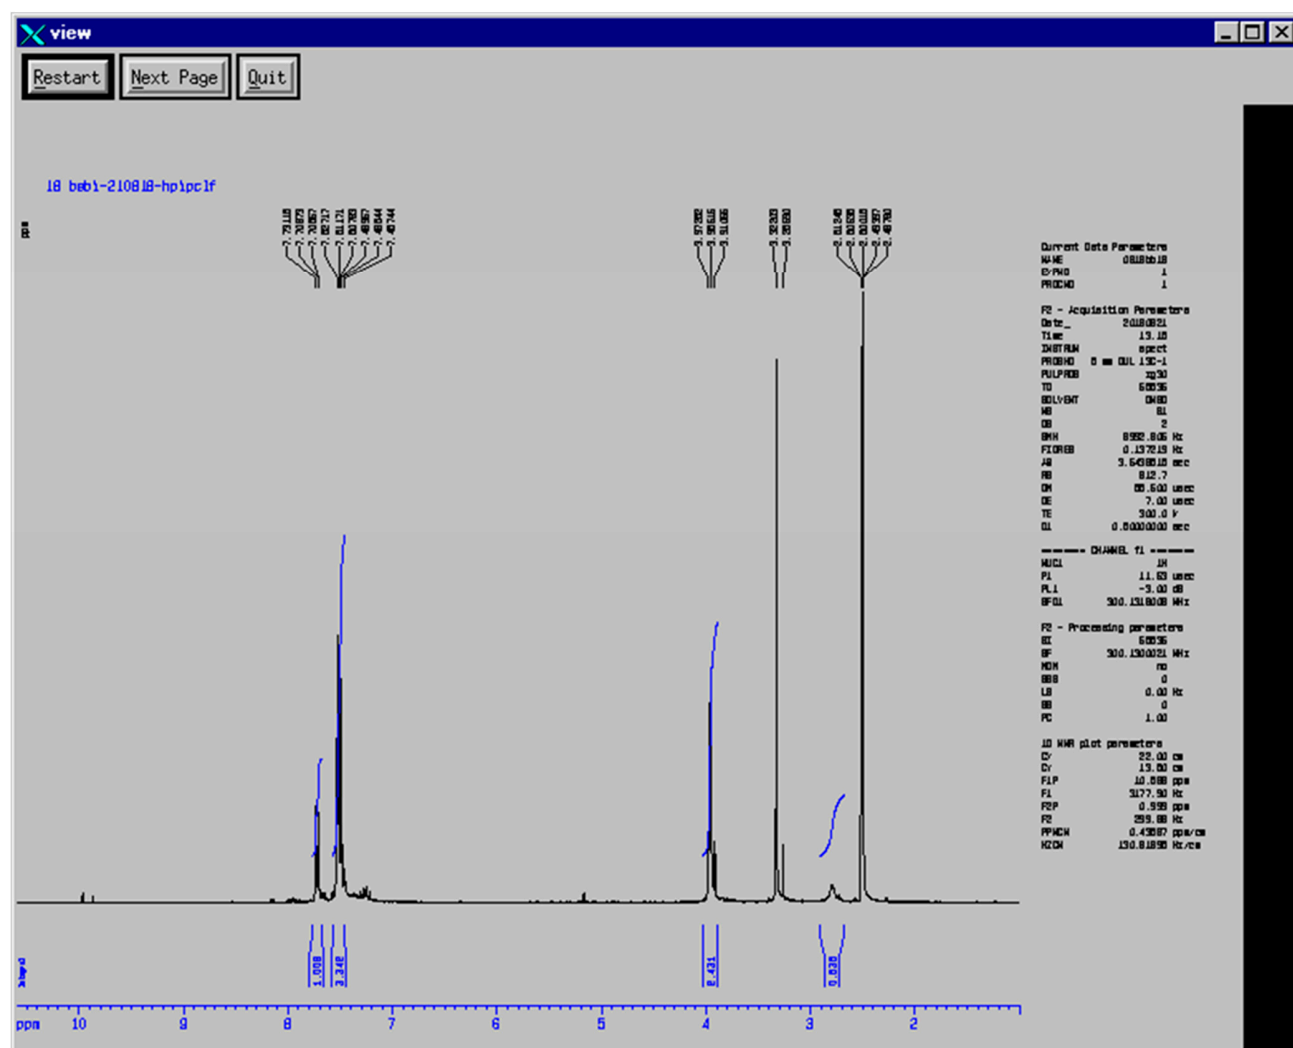

$^{13}\text{C}$  NMR spectrum of **1h**

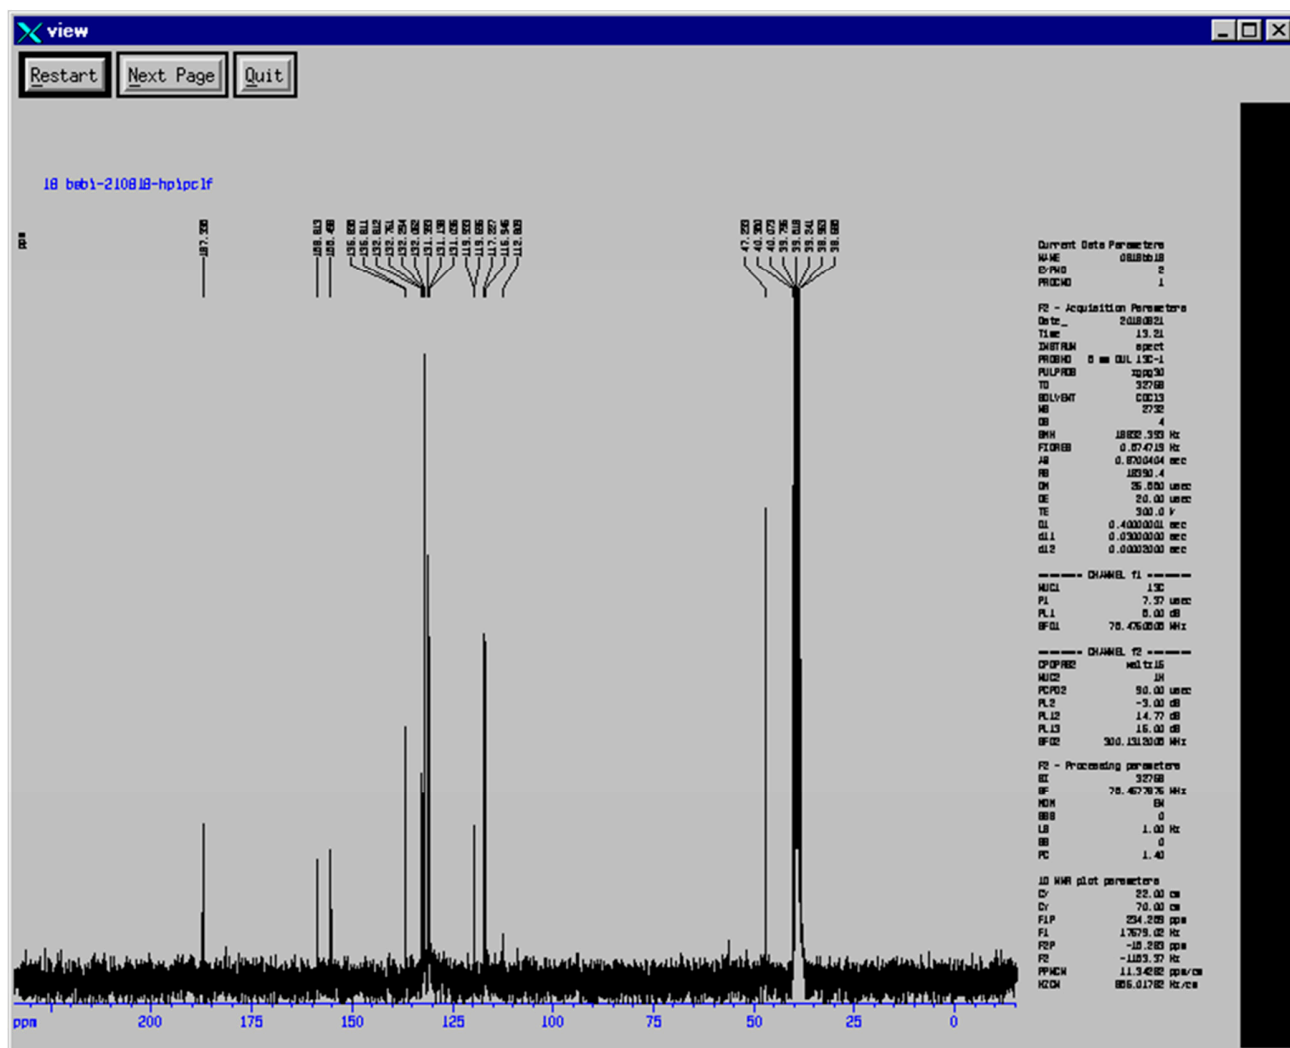

view

Restart Next Page Quit

147 bbb1-250717-acryl3f

Current Data Parameters

|        |           |
|--------|-----------|
| NAME   | 0717bbb17 |
| EXPNO  | 1         |
| PROCNO | 1         |

F2 - Acquisition Parameters

|         |               |
|---------|---------------|
| Date_   | 20170720      |
| Time    | 13.20         |
| INSTRUM | QNP1H         |
| PROBHD  | 5 mm QNP 1H-1 |
| PULPROG | zgpg30        |
| TD      | 65536         |
| SOLVENT | DMSO          |
| NS      | 1.00          |
| DS      | 2             |
| SWH     | 8982.806 Hz   |
| FIDRES  | 0.137018 Hz   |
| AQ      | 5.6400000 sec |
| RG      | 11.40.4       |
| CH      | 00.600 sec    |
| DE      | 7.00 sec      |
| TE      | 300.0 K       |
| CL      | 0.5000000 sec |

----- CHANNEL f1 -----

|      |                 |
|------|-----------------|
| NUC1 | 1H              |
| PL1  | 11.00 sec       |
| PL1  | -3.00 dB        |
| RFQ1 | 300.1310000 MHz |

F2 - Processing parameters

|     |                 |
|-----|-----------------|
| SI  | 65536           |
| BF  | 300.1300135 MHz |
| NDM | no              |
| BB  | 0               |
| LB  | 0.00 Hz         |
| GB  | 0               |
| PC  | 1.00            |

1D NMR plot parameters

|       |                 |
|-------|-----------------|
| CD    | 22.00 cm        |
| Cr    | 13.00 cm        |
| FLP   | 9.225 ppm       |
| FI    | 2565.75 Hz      |
| FSP   | -0.004 ppm      |
| FE    | -101.25 Hz      |
| PPHCH | 0.44040 ppm/cm  |
| HZCM  | 132.77631 Hz/cm |

ppm

$^{13}\text{C}$  NMR spectrum of **2b**

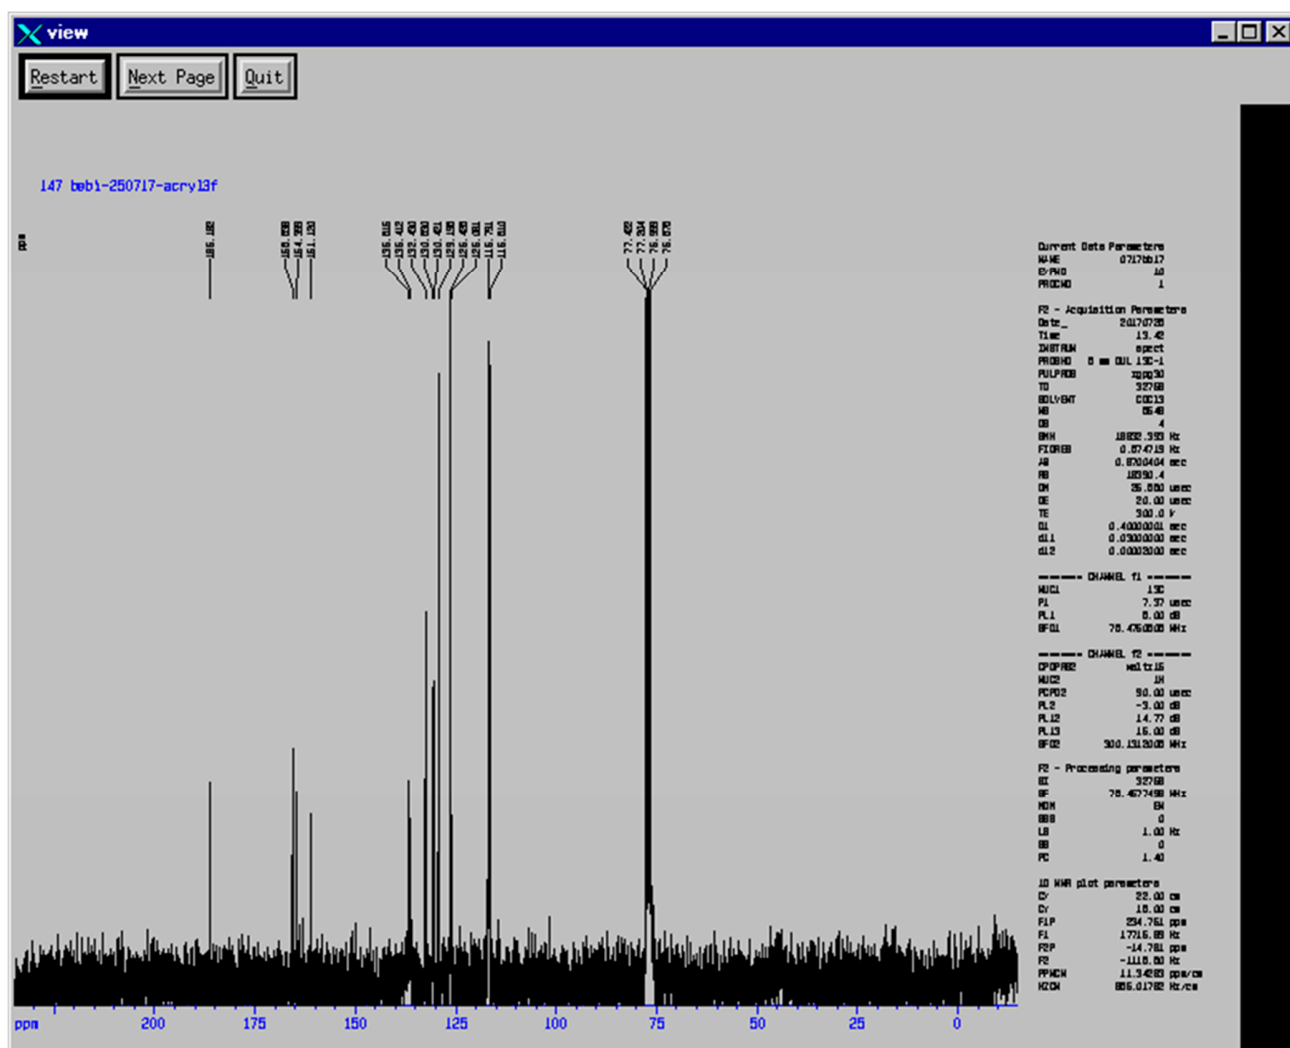

$^1\text{H}$  NMR spectrum of **2c**

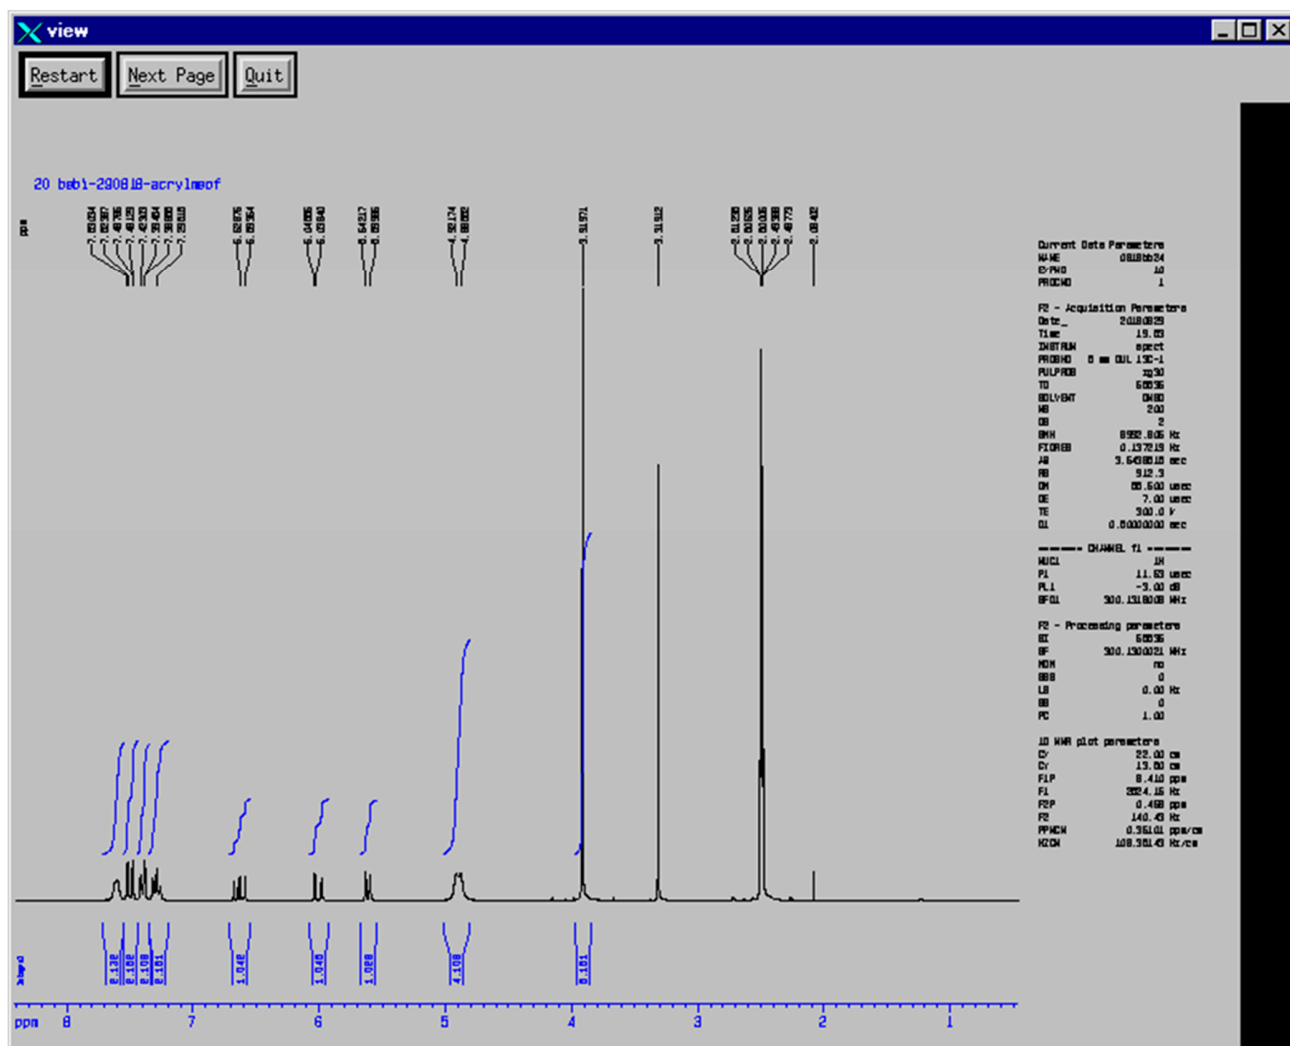

$^{13}\text{C}$  NMR spectrum of **2c**

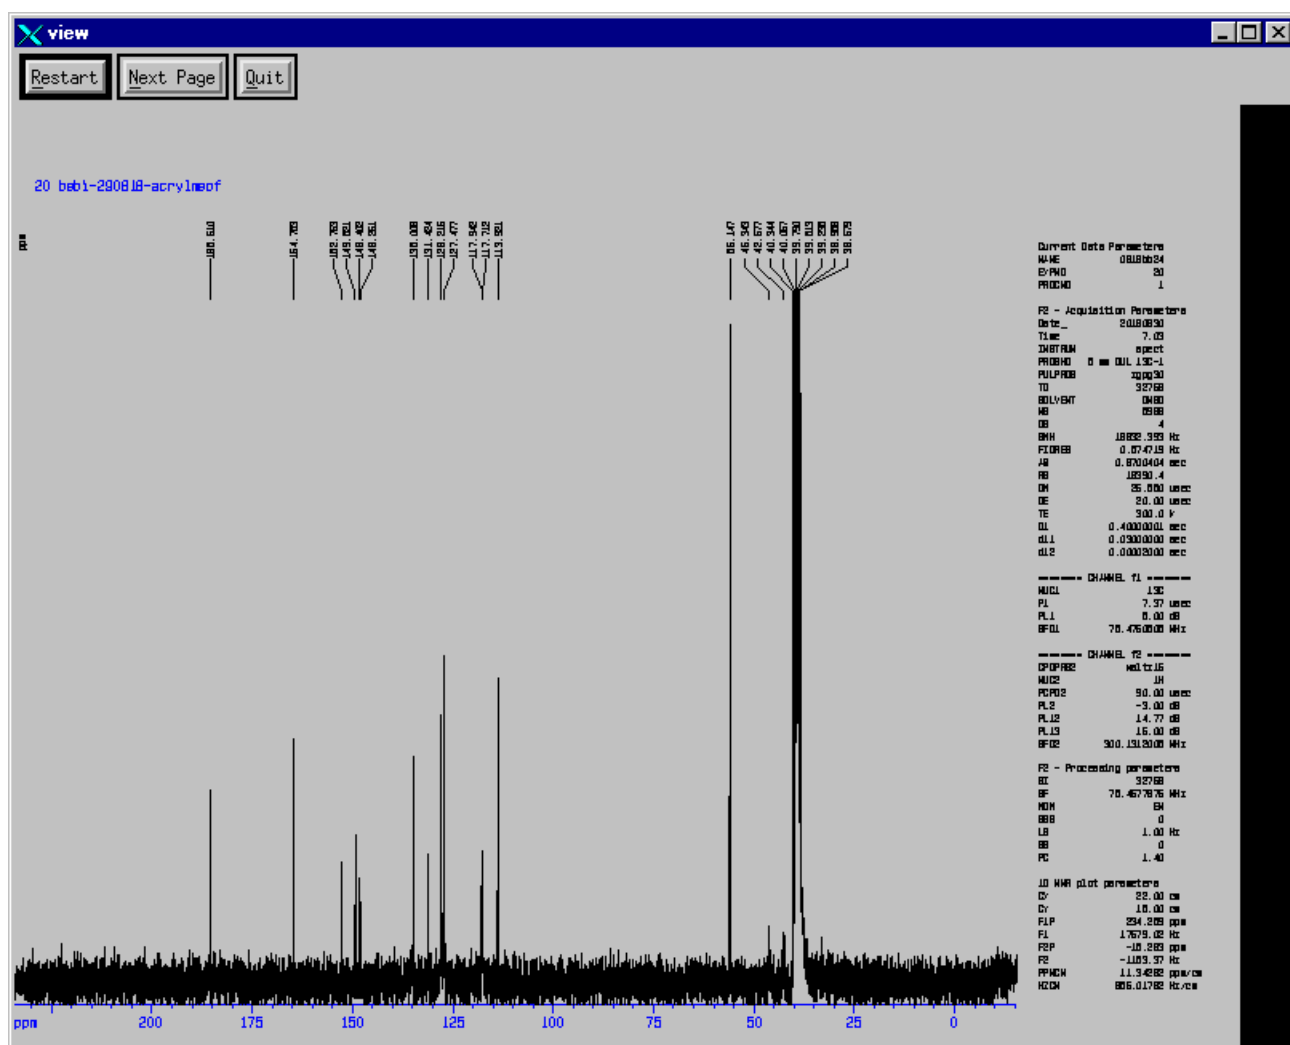

$^1\text{H}$  NMR spectrum of **2e**

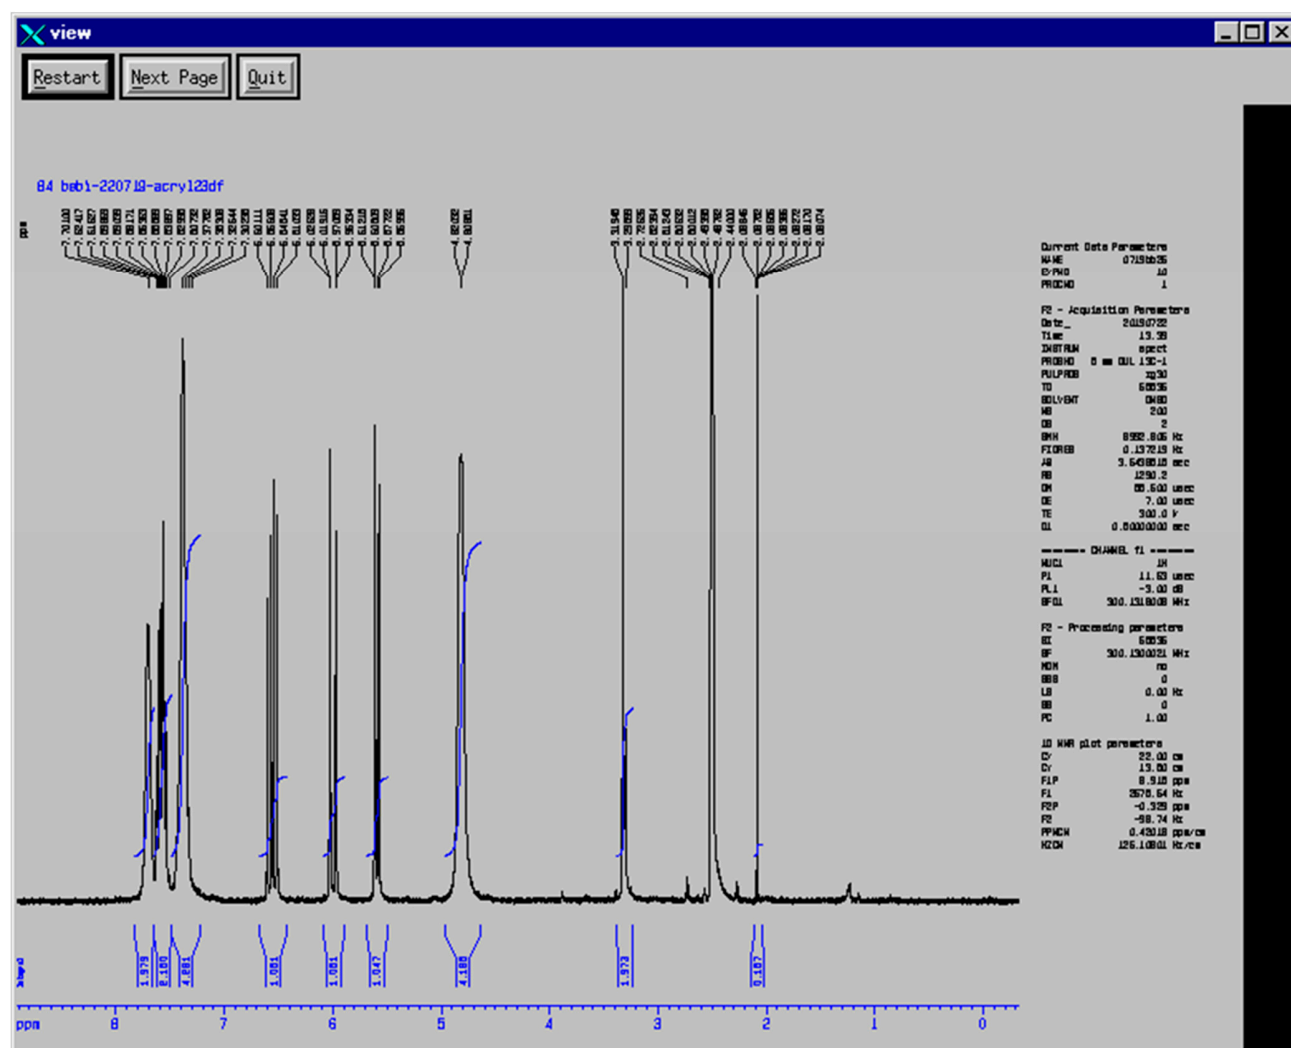



$^{13}\text{C}$  NMR spectrum of **2e**

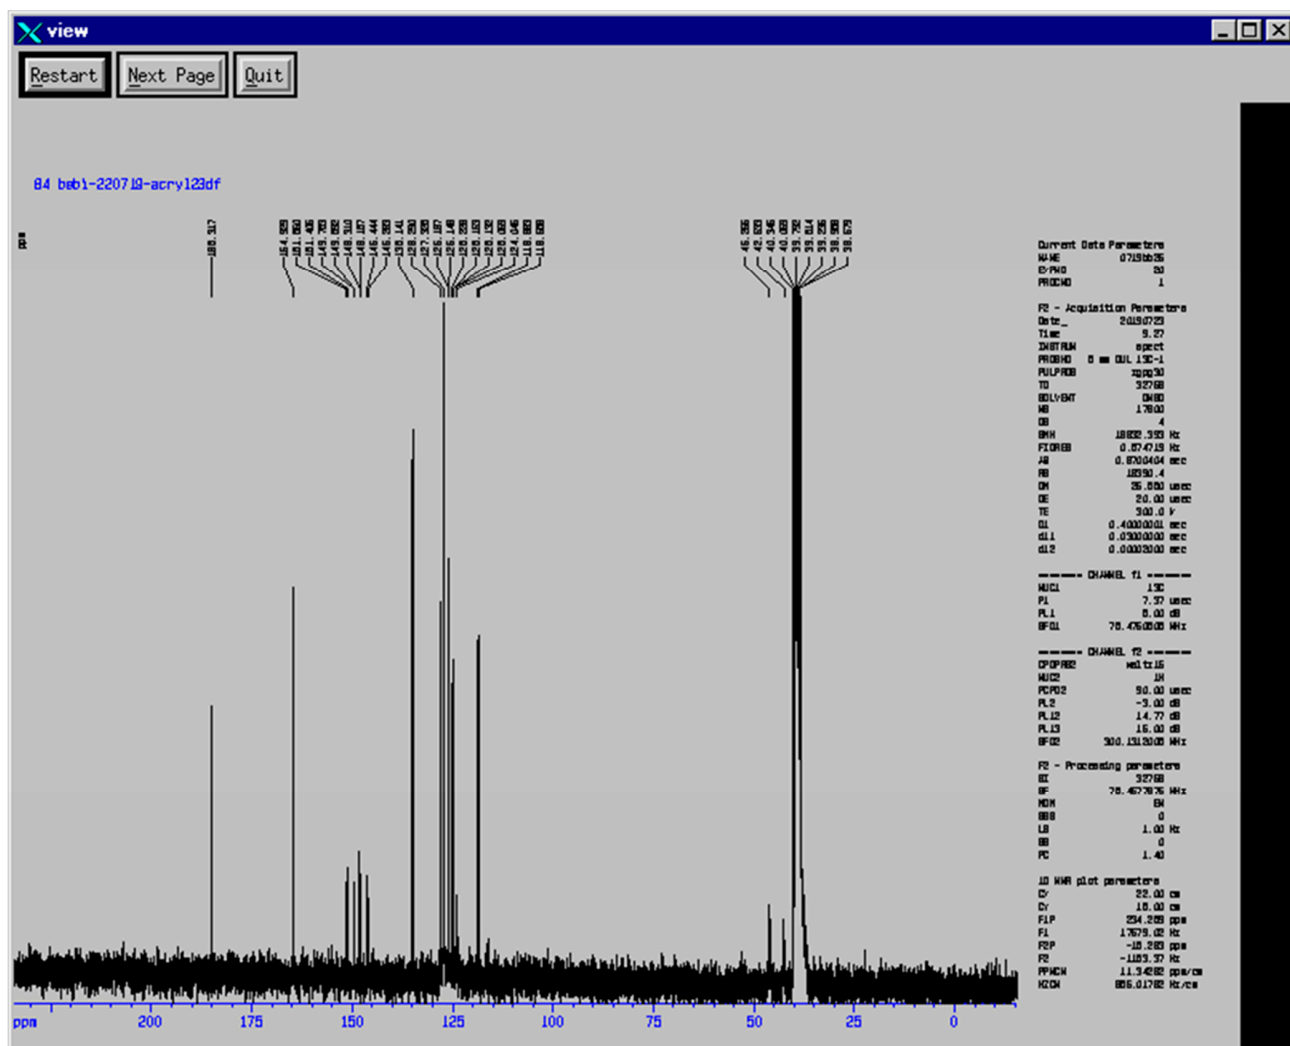

$^1\text{H}$  NMR spectrum of **2f**

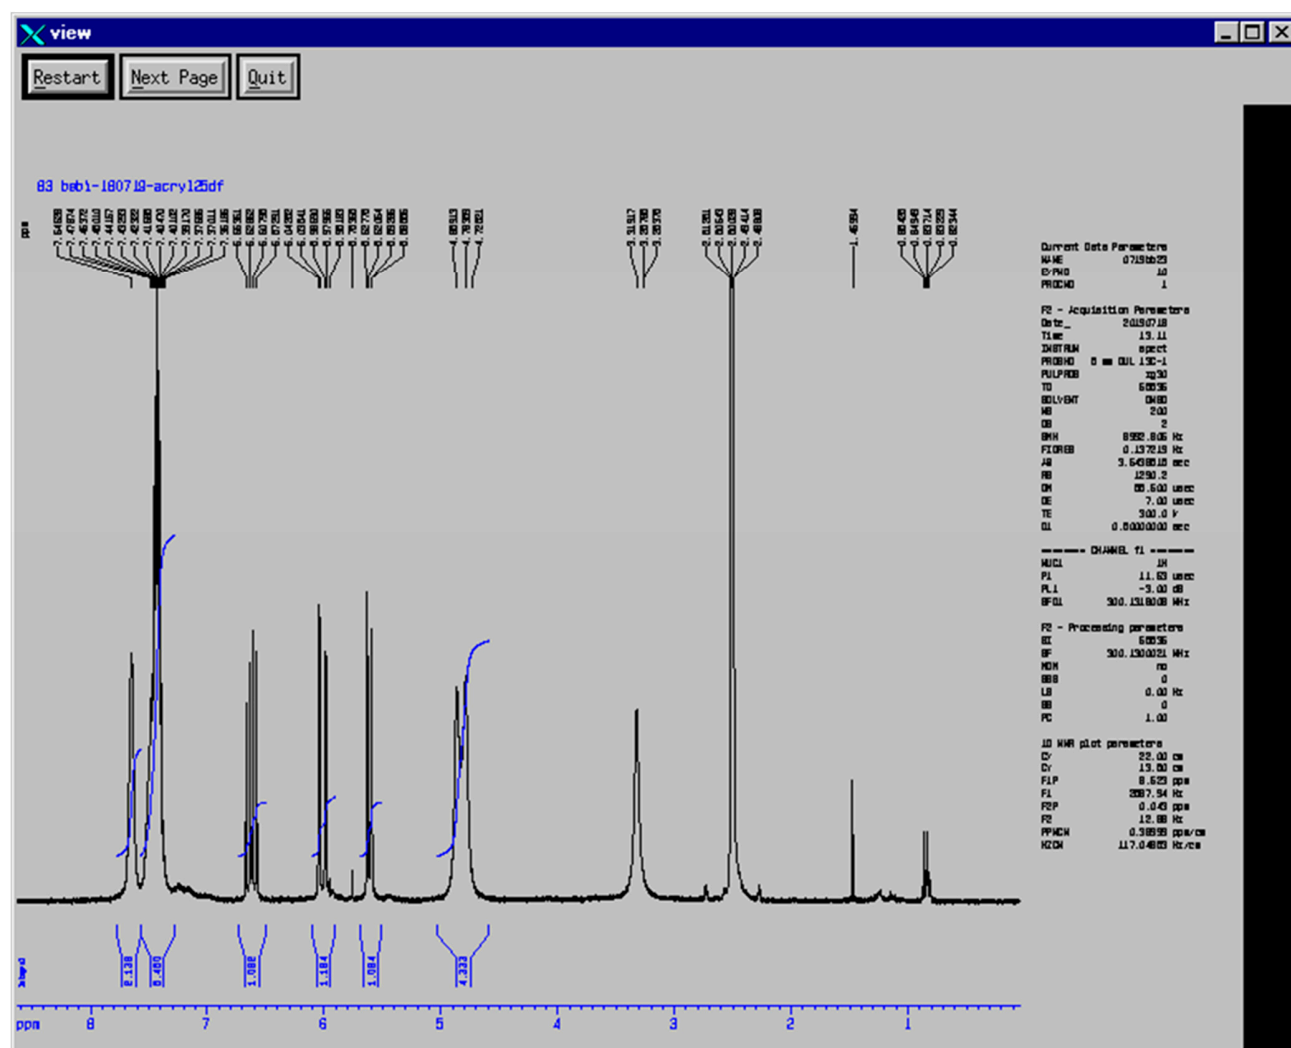

$^{13}\text{C}$  NMR spectrum of **2f**

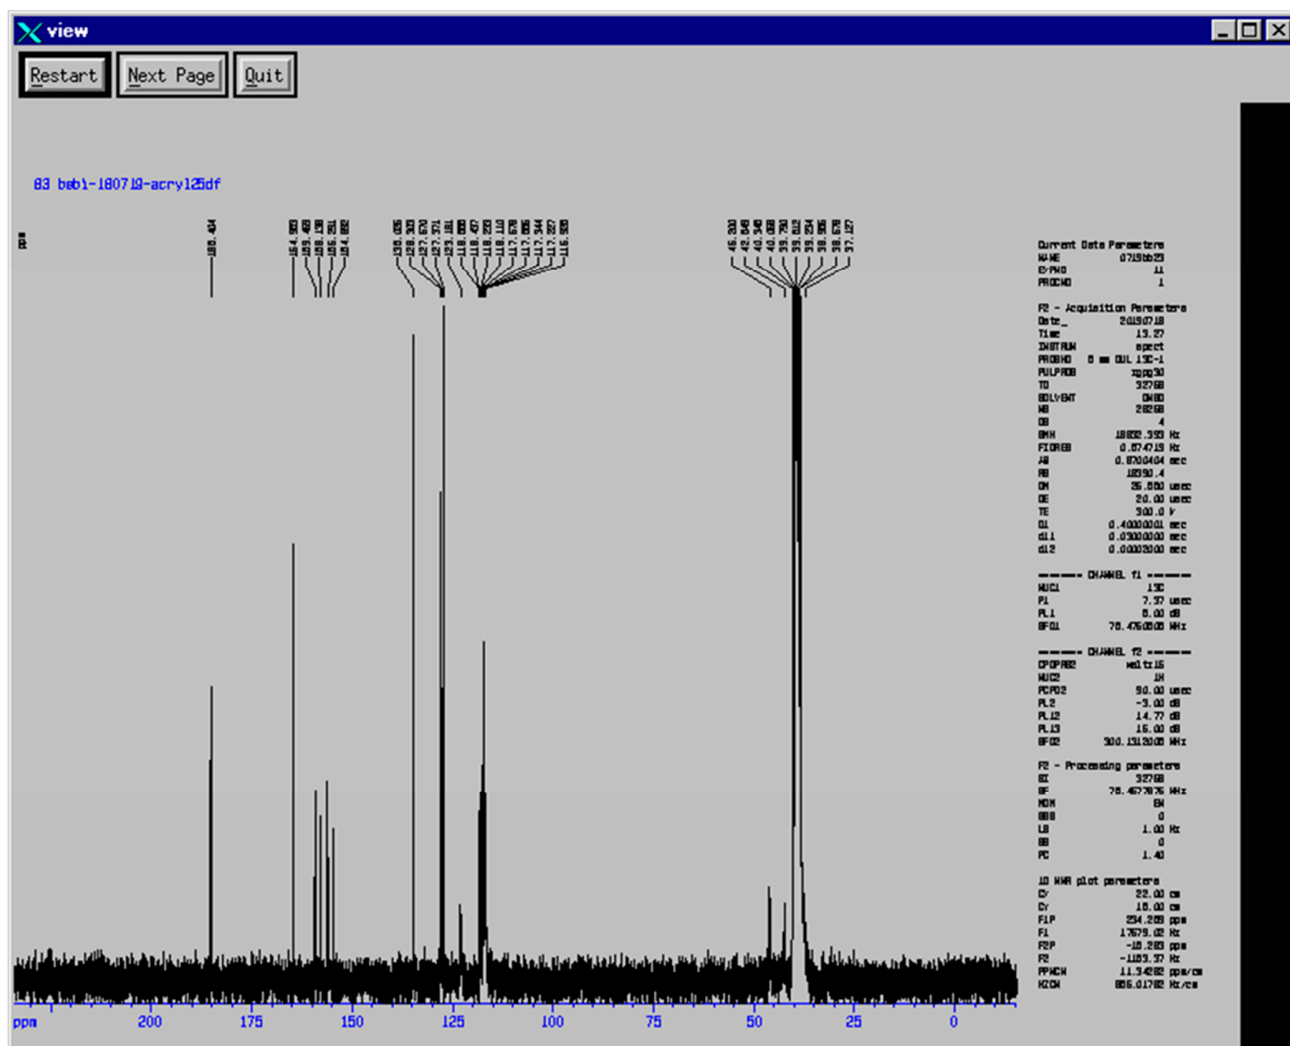

$^1\text{H}$  NMR spectrum of **2g**

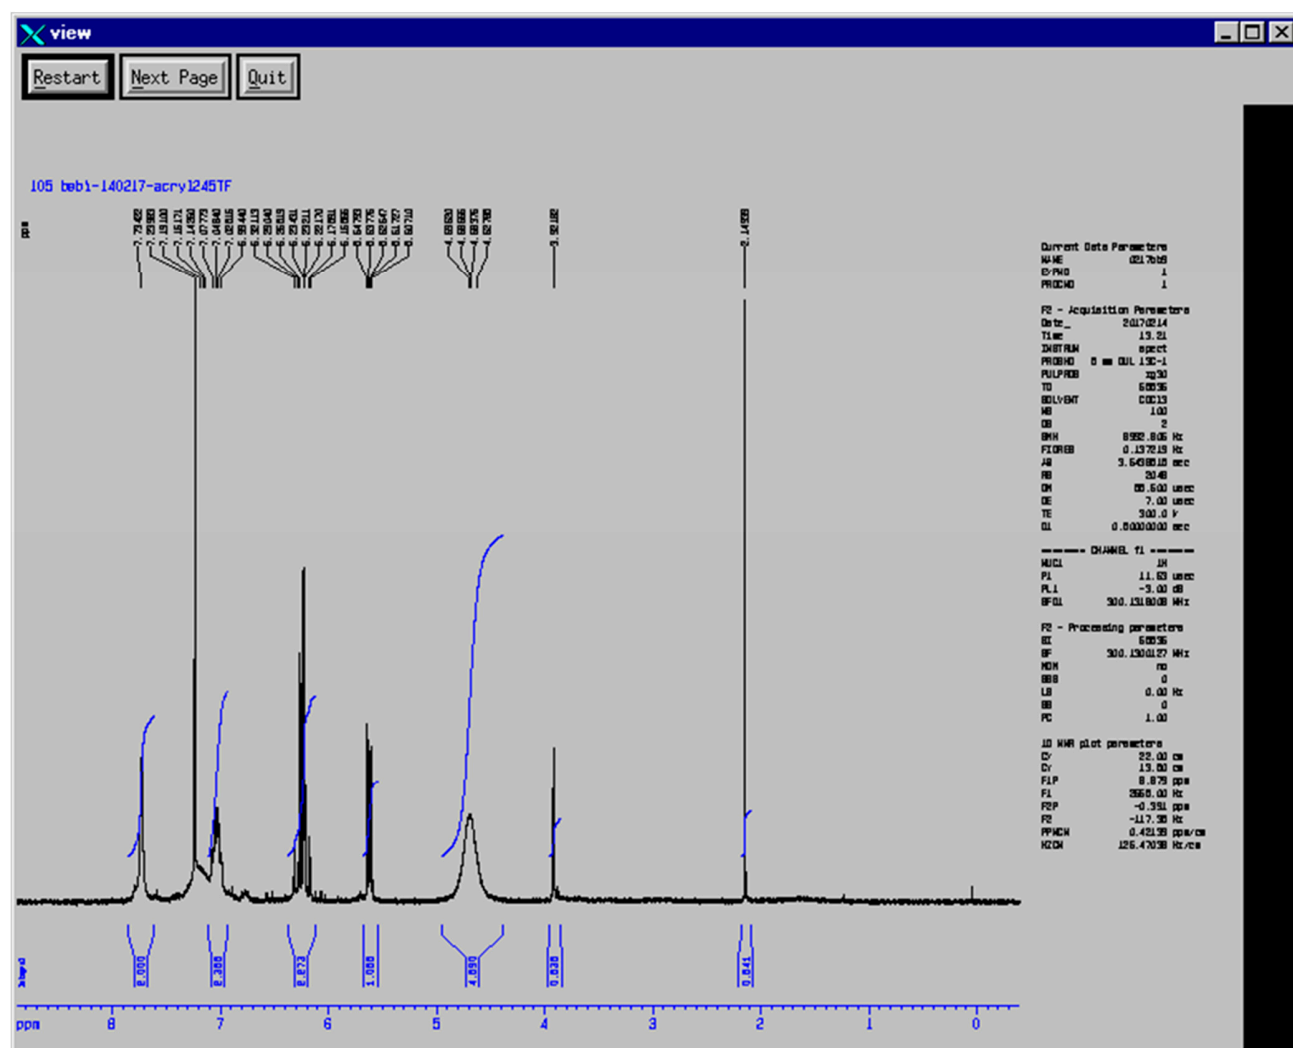

105 bb1-140217-acry1245TF

ppm

185.00 152.84 133.76 129.45 129.22 128.92 128.62 118.50 118.08 106.00 106.11 77.45 77.02 76.62 76.20 56.84

view

Restart Next Page Quit

Current Data Parameters  
NAME 02170818  
EXPNO 2  
PROCNO 1

F2 - Acquisition Parameters  
Date\_ 20170218  
Time 7.08  
INSTRUM spect  
PROBHD 5 mm QNP 1H-1  
PULPROG zgpg30  
TD 32768  
SOLVENT CDCl3  
NS 22480  
DS 4  
SWH 18082.333 Hz  
FIDRES 0.374718 Hz  
AQ 0.870464 sec  
RG 18730.4  
DM 25.000 umsec  
DE 2.000 umsec  
TE 300.2 K  
C1 0.4000000 sec  
d11 0.0300000 sec  
d12 0.0000000 sec

----- CHANNEL f1 -----  
NUC1 13C  
P1 7.37 umsec  
PL1 0.00 dB  
RFQ1 75.476205 MHz

----- CHANNEL f2 -----  
CPDPRG2 waltz16  
NUC2 1H  
PCPD2 9.00 umsec  
PL2 -5.00 dB  
PL12 14.77 dB  
PL13 16.00 dB  
RFQ2 300.131200 MHz

F2 - Processing parameters  
SI 32768  
SF 75.467486 MHz  
WDW EM  
SSB 0  
LB 1.00 Hz  
GB 0  
PC 1.40

1D NMR plot parameters  
Cv 22.00 cm  
Cy 18.00 cm  
PLP 254.776 ppm  
F1 170.18.00 Hz  
F2P -14.766 ppm  
F2 -1114.38 Hz  
PPMH 11.54023 ppm/cm  
KZMH 886.01782 Hz/cm

$^1\text{H}$  NMR spectrum of **2h**

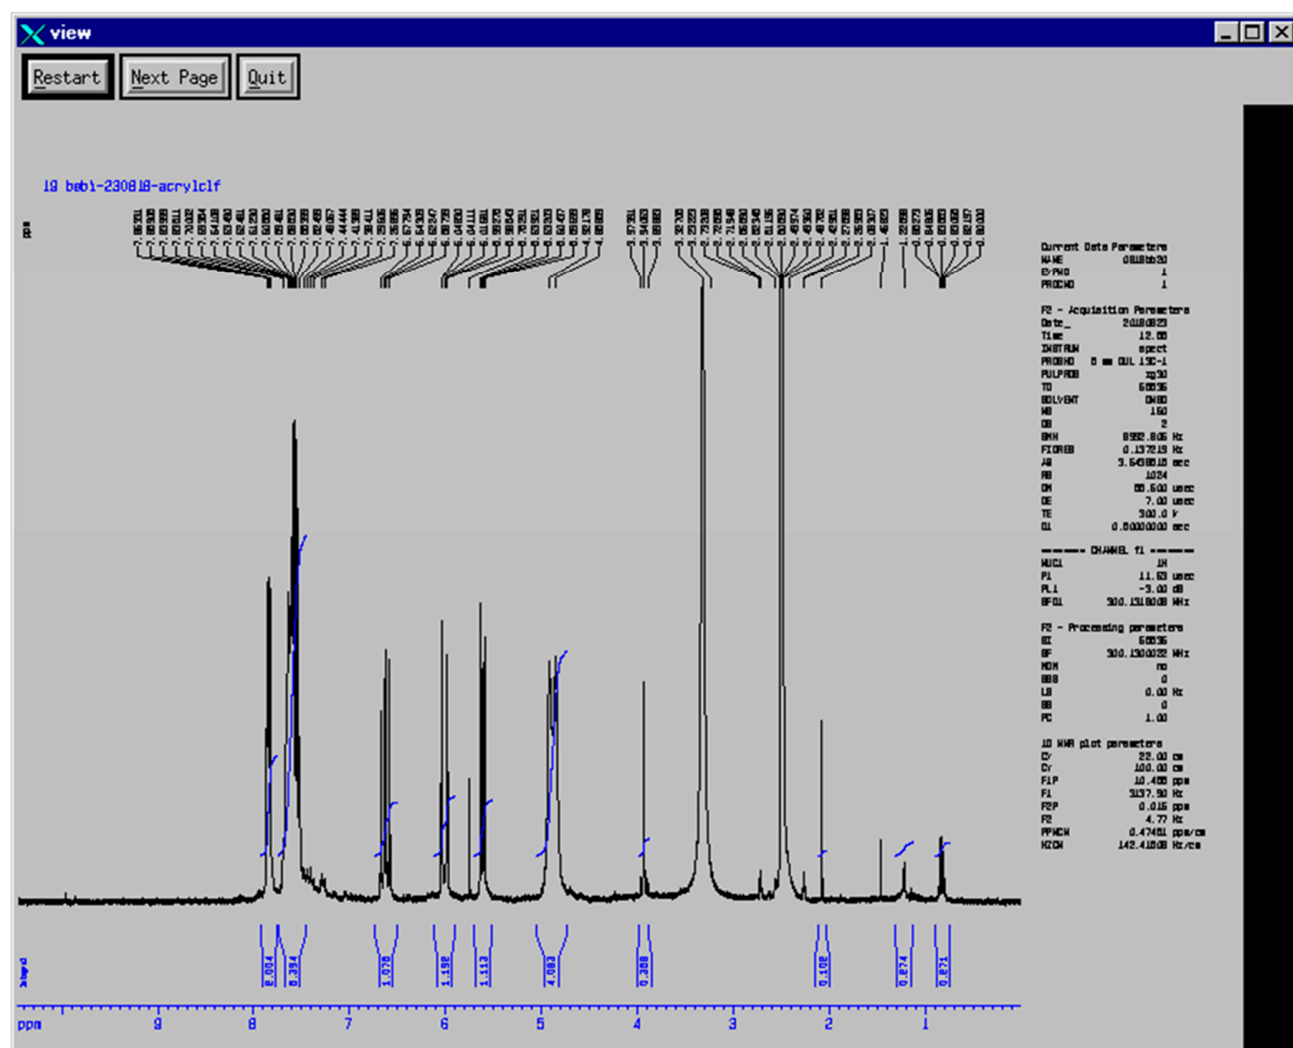

$^{13}\text{C}$  NMR spectrum of **2h**

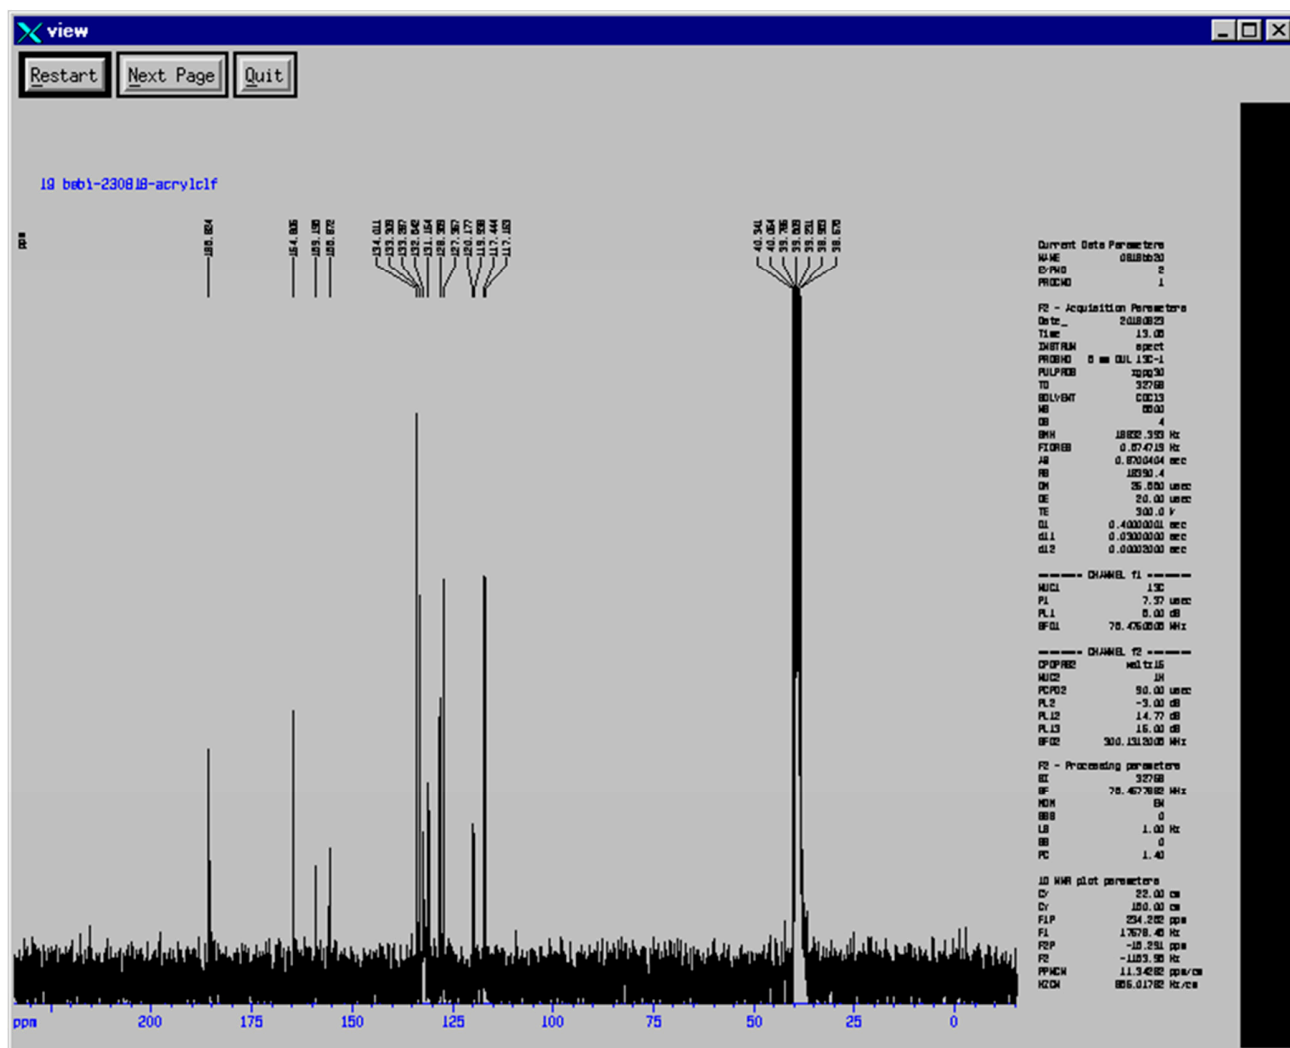

ESI-MS spectrum of **2b**

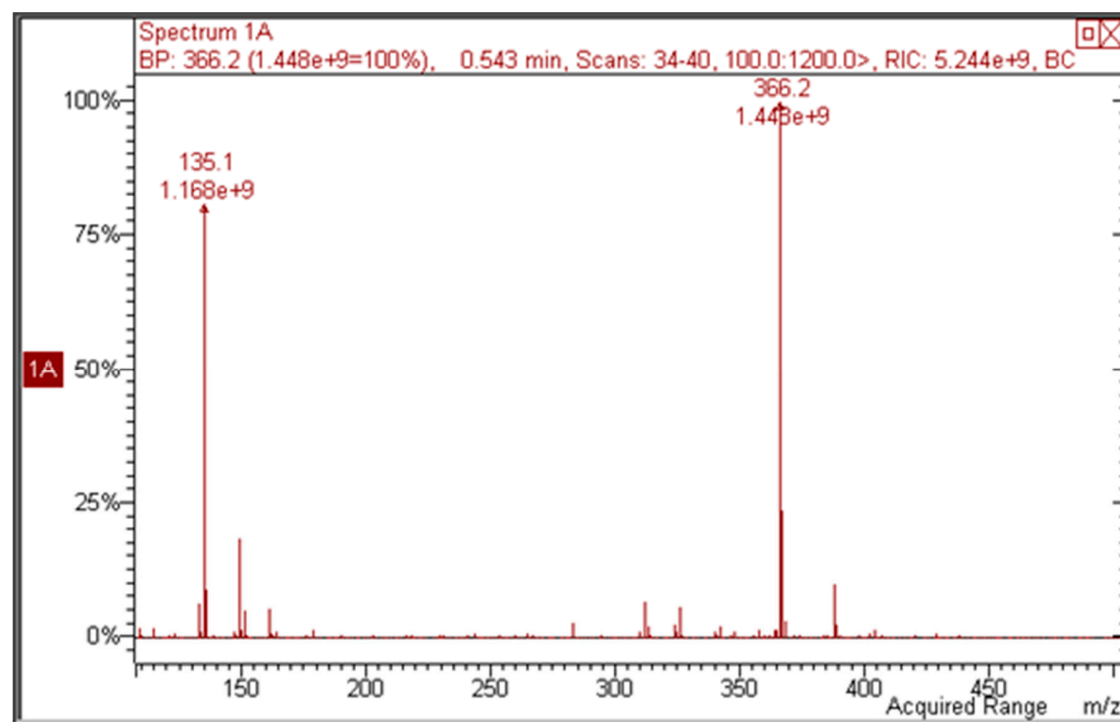



## EI mass spectrum of **1c**

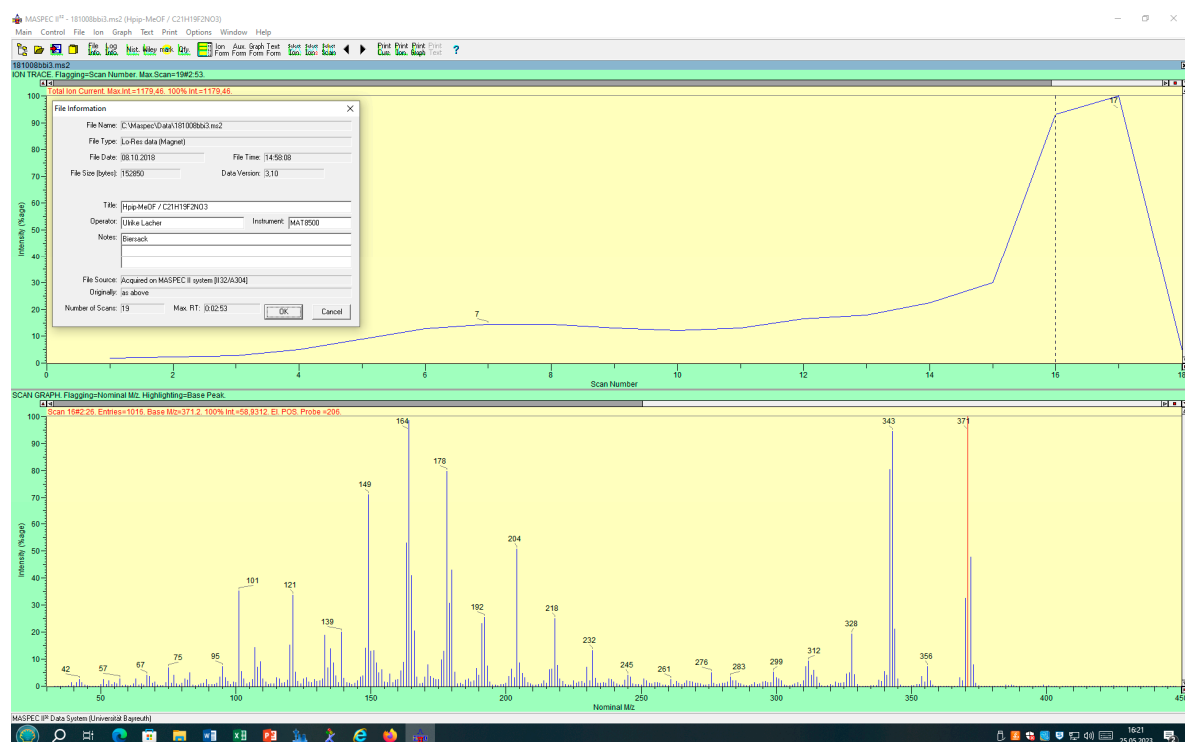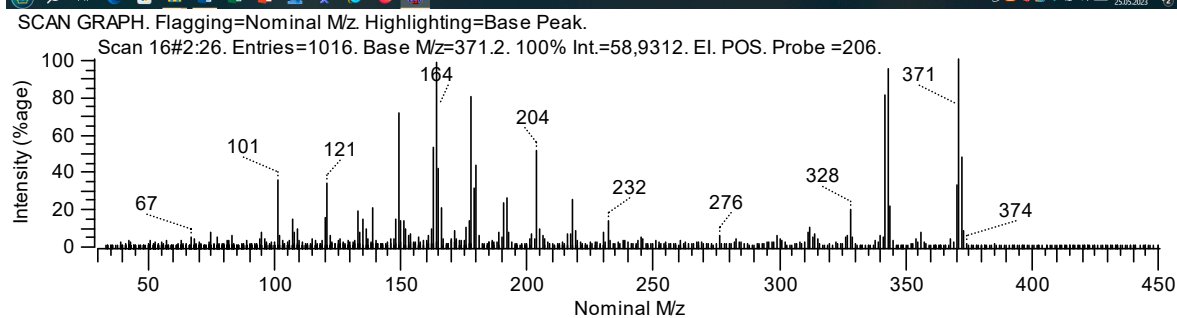

## EI mass spectrum of **1e**

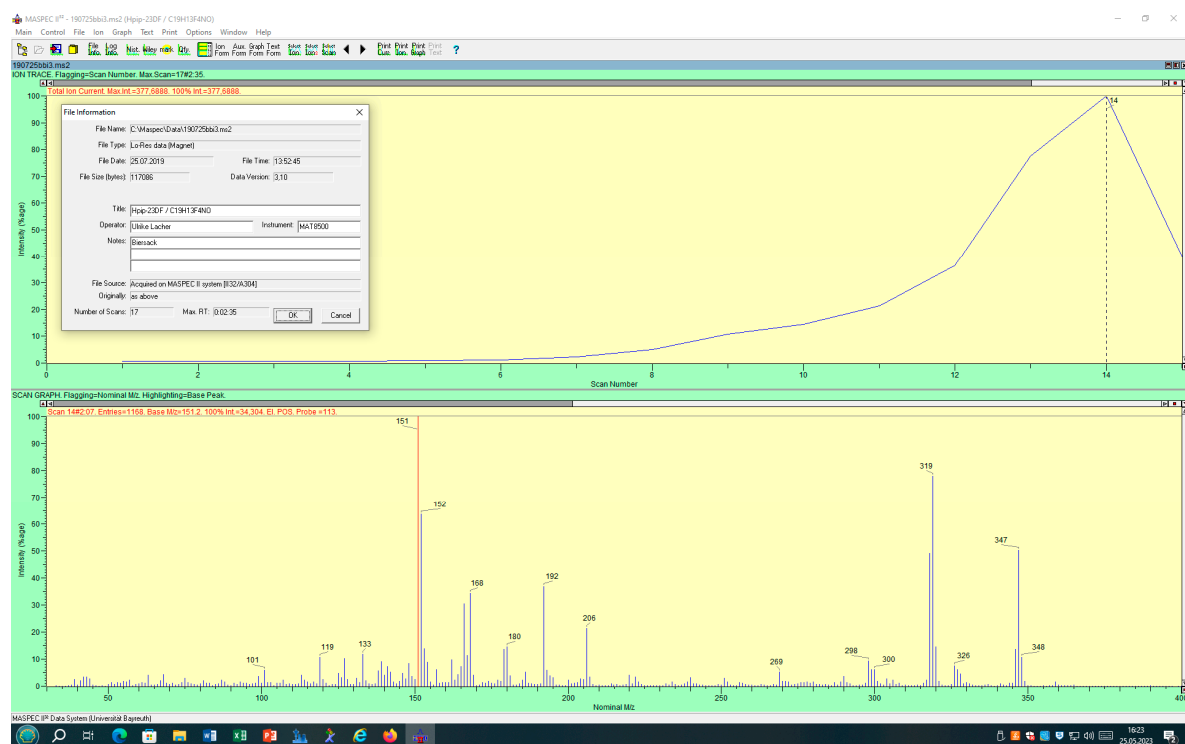

SCAN GRAPH. Flaggng=Nominal M/z. Highlighting=Base Peak.

Scan 14#2:07. Entries=1168. Base M/z=151.2. 100% Int.=34,304. EI. POS. Probe =113.

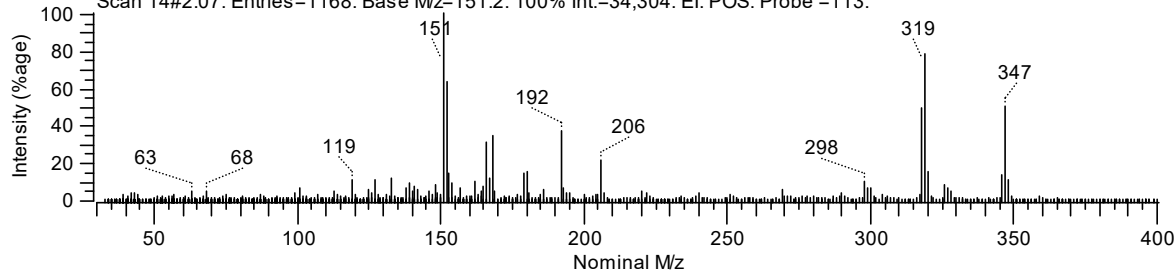

## EI mass spectrum of **1f**

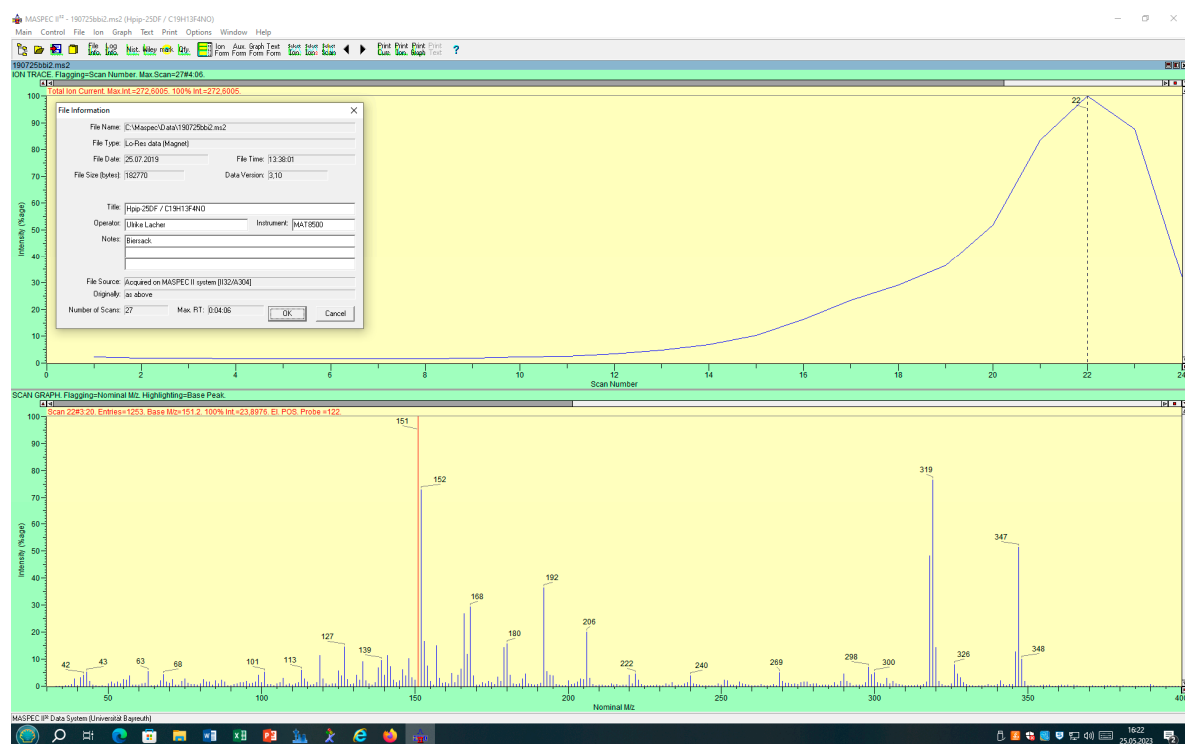

SCAN GRAPH. Flagging=Nominal M/z. Highlighting=Base Peak.

Scan 22#3:20. Entries=1253. Base M/z=151.2. 100% Int.=23,8976. EI. POS. Probe =122.

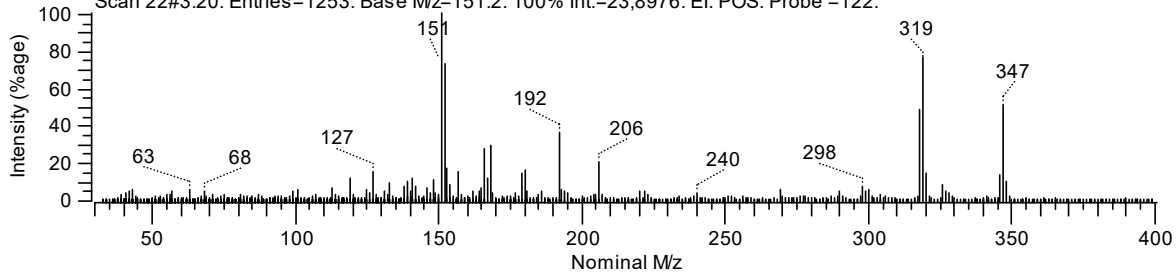

## EI mass spectrum of **1g**

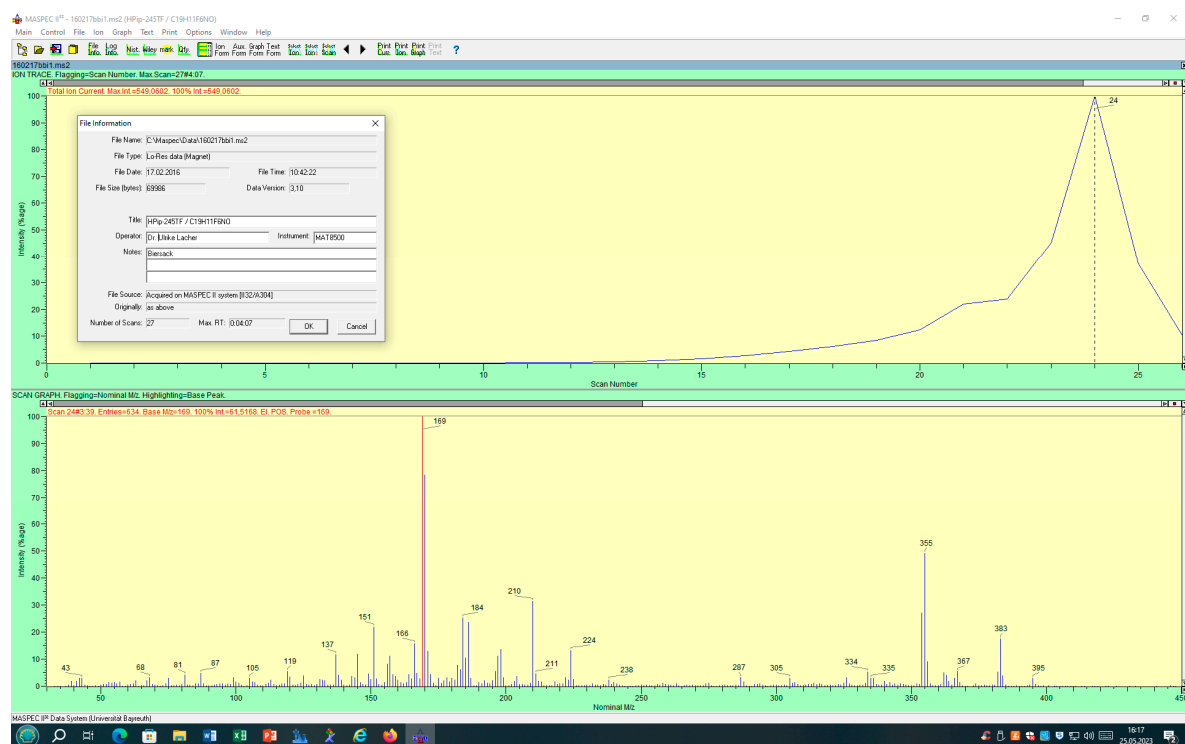

SCAN GRAPH. Flagging=Nominal M/z. Highlighting=Base Peak.  
Scan 24#3:39. Entries=634. Base M/z=169. 100% Int.=61,5168. EI. POS. Probe =169.

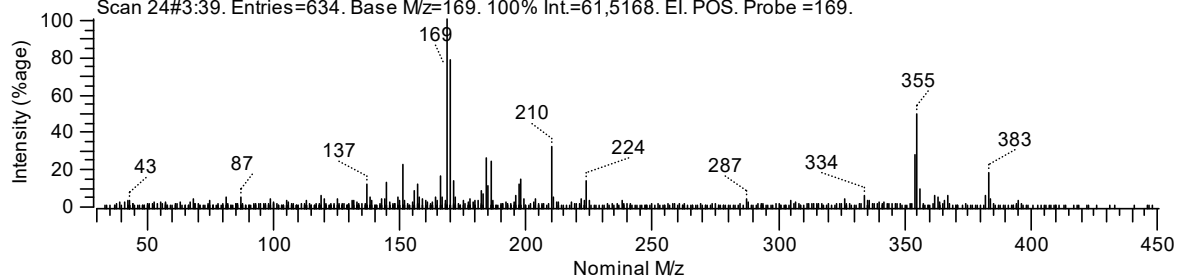

## EI mass spectrum of **1h**

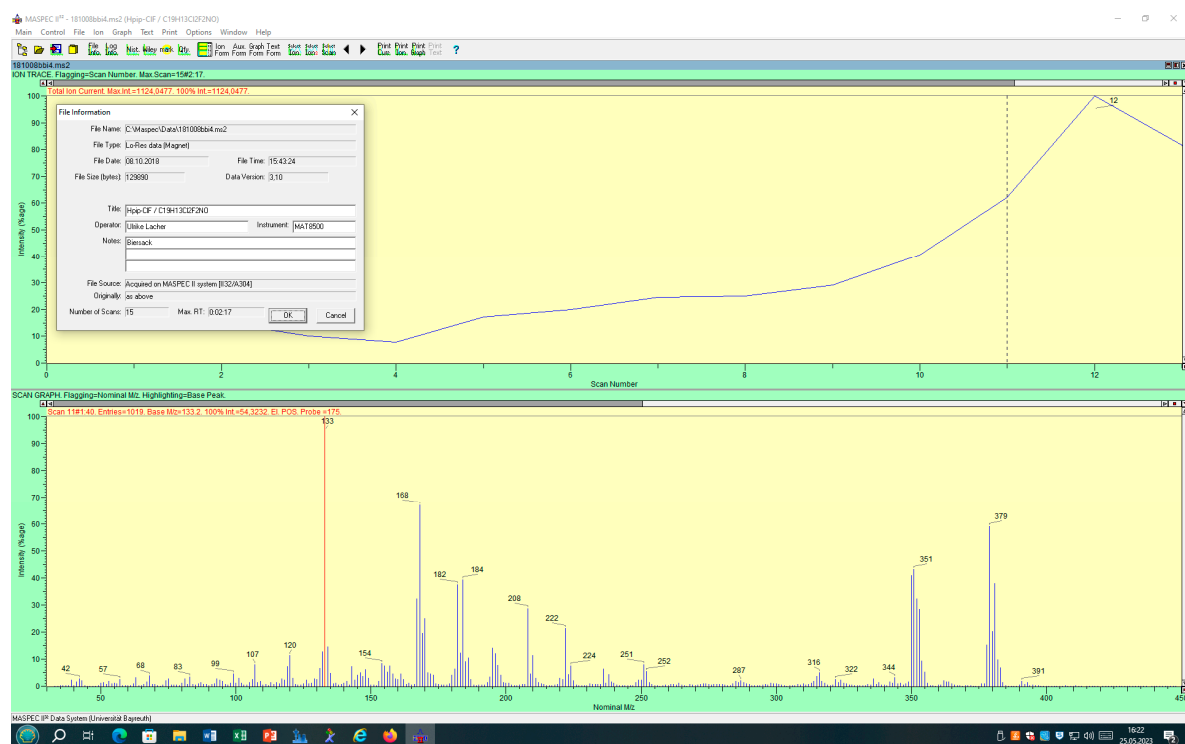

SCAN GRAPH. Flaggng=Nominal M/z. Highlighting=Base Peak.

Scan 11#1:40. Entries=1019. Base M/z=133.2. 100% Int.=54,3232. El. POS. Probe =175.

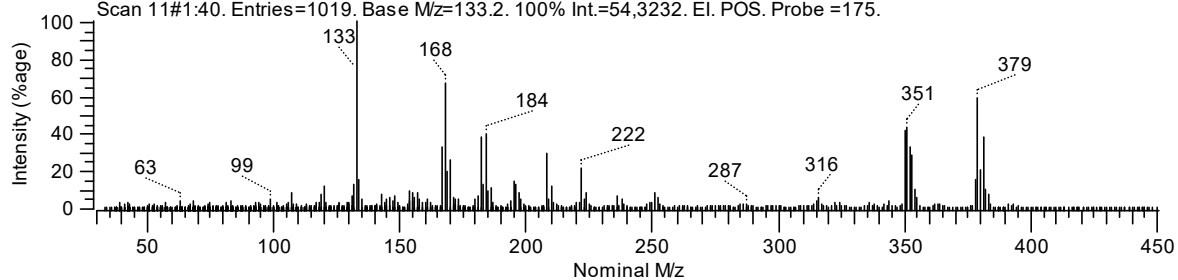

## EI mass spectrum of 2c

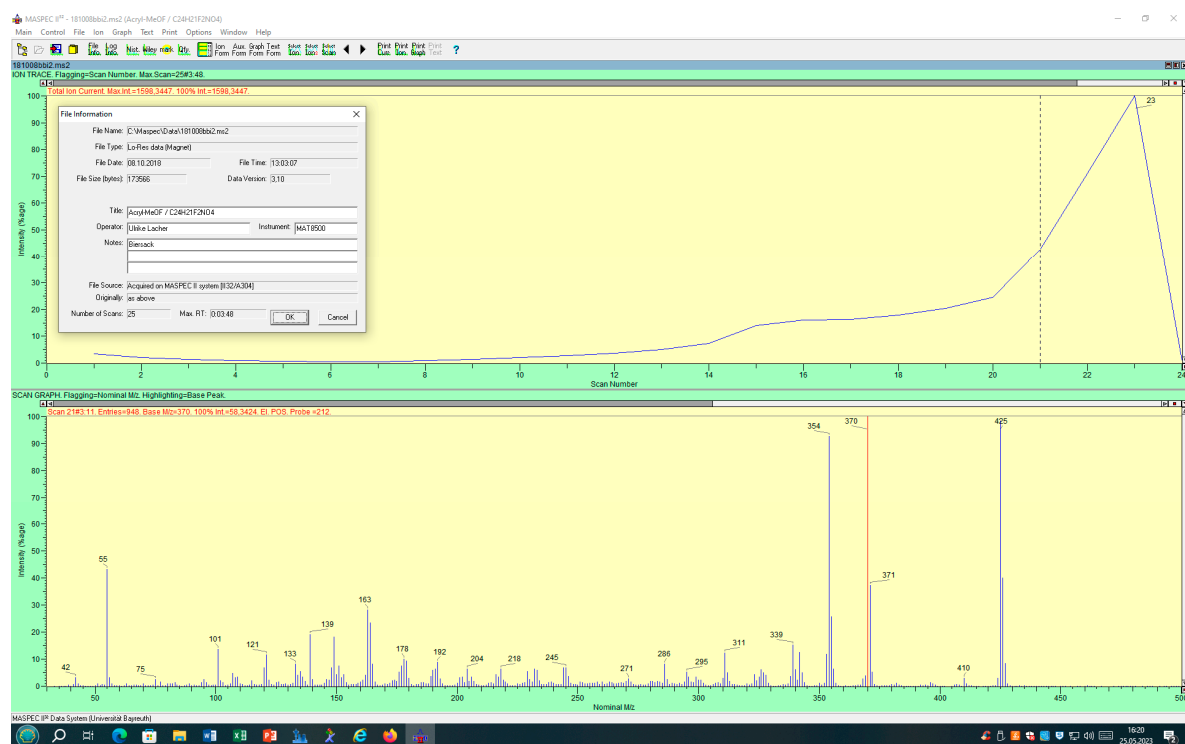

SCAN GRAPH. Flagging=Nominal M/z. Highlighting=Base Peak.

Scan 21#3:11. Entries=948. Base M/z=370. 100% Int.=58,3424. EI. POS. Probe =212.

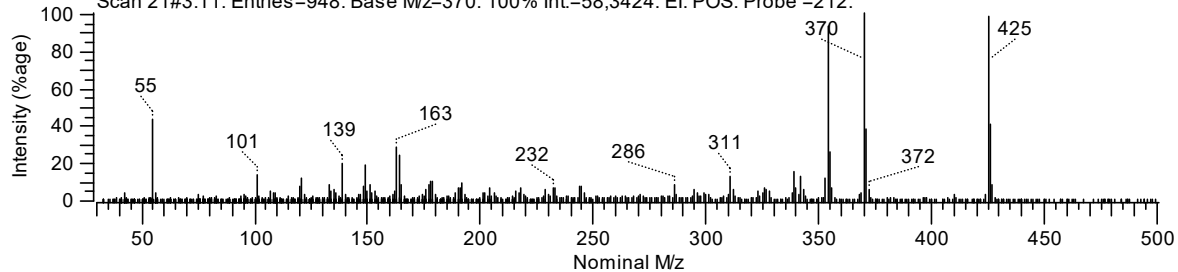

## EI mass spectrum of 2e

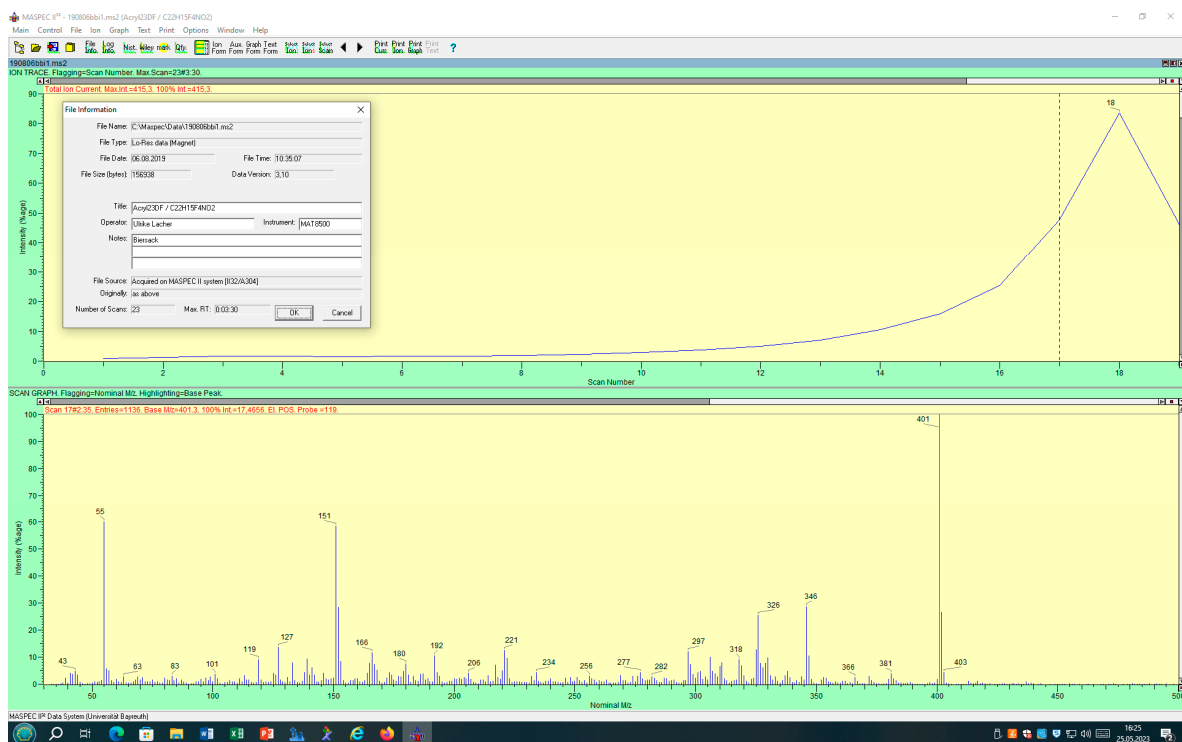

SCAN GRAPH. Flagging=Nominal M/z. Highlighting=Base Peak.

Scan 17#2:35. Entries=1136. Base M/z=401.3. 100% Int.=17,4656. EI. POS. Probe =119.

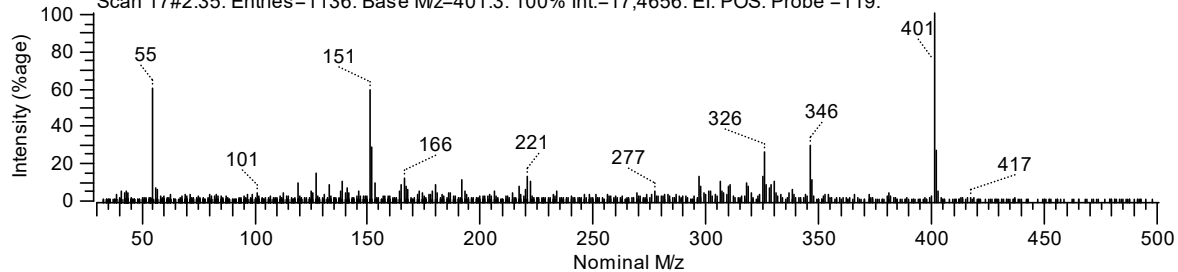

## EI mass spectrum of **2f**

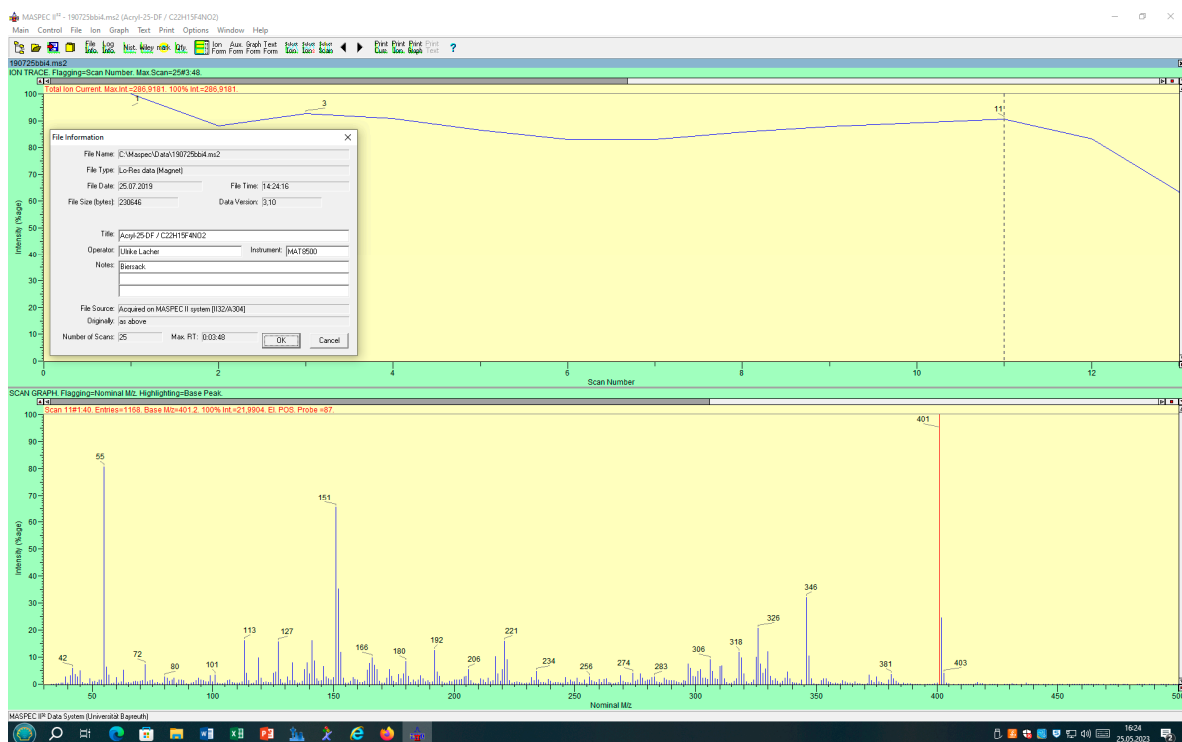

SCAN GRAPH. Flagg=Nominal M/z. Highlighting=Base Peak.

Scan 11#1:40. Entries=1168. Base M/z=401.2. 100% Int.=21,9904. El. POS. Probe =87.

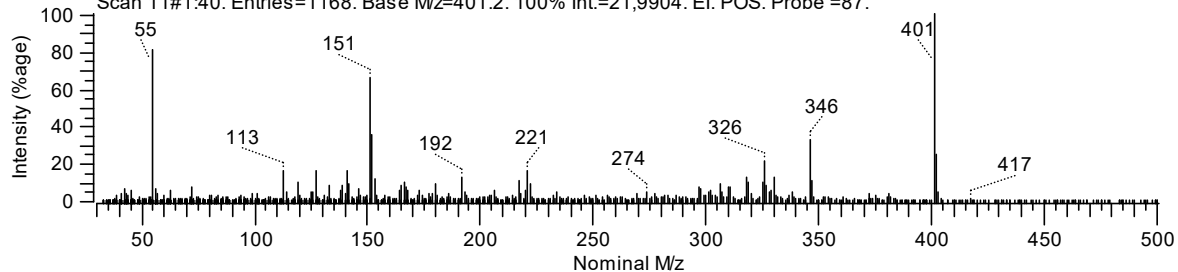



## EI mass spectrum of 2g

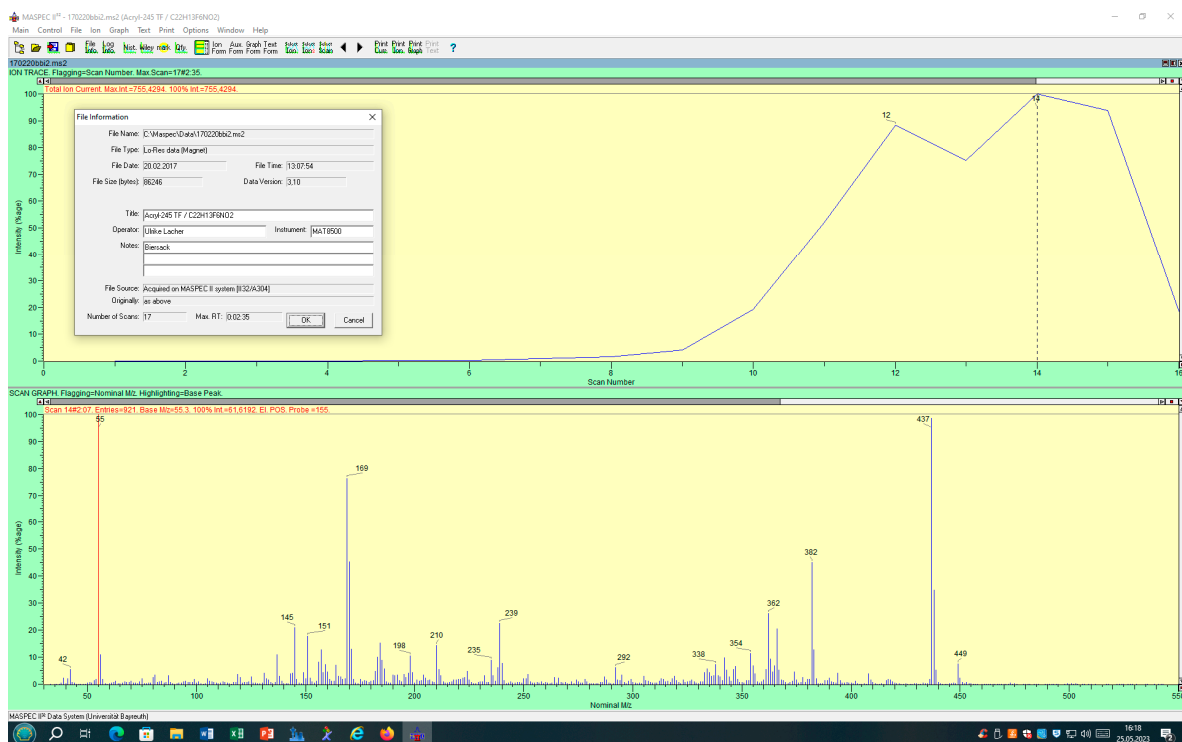

SCAN GRAPH. Flagging=Nominal M/z. Highlighting=Base Peak.

Scan 14#2:07. Entries=921. Base M/z=55.3. 100% Int.=61,6192. EI. POS. Probe =155.

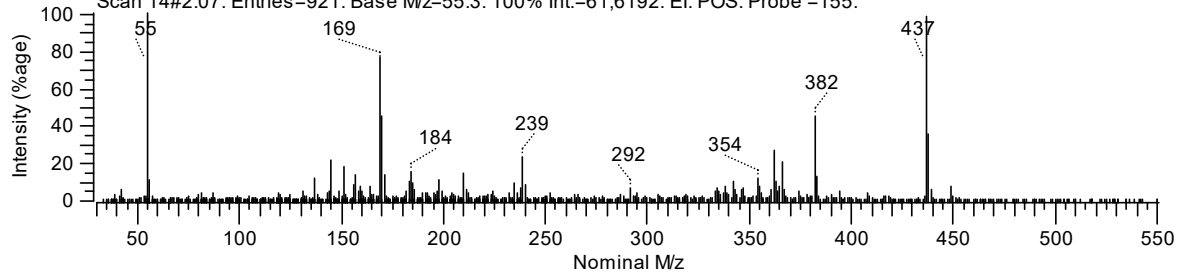

## EI mass spectrum of **2h**

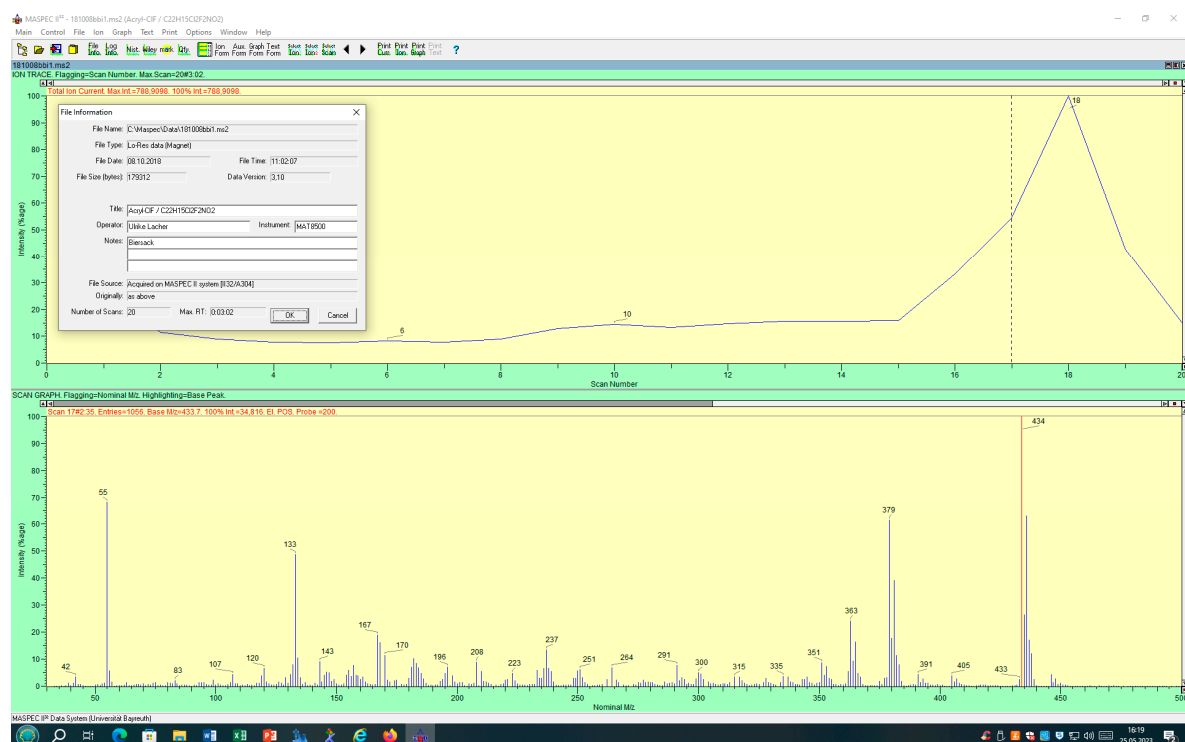

SCAN GRAPH. Flagging=Nominal M/z. Highlighting=Base Peak.

Scan 17#2:35. Entries=1056. Base M/z=433.7. 100% Int.=34,816. EI. POS. Probe =200.

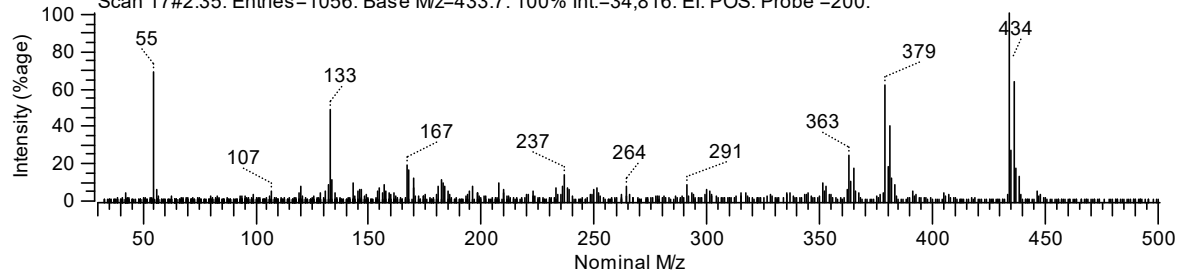

Supplement: s1 [file s1]
